# Supplementary material
Source: publisher figshare collection journal article supplement (https://acs.figshare.com/ndownloader/files/4518103)
Supplement: Supplementary file 1 [file 4518103]

SUPPORTING INFORMATION for the article entitled

**A mild method for the efficient, [3,3]-sigmatropic rearrangement of *N,O*-diacyl hydroxylamines**

Helen Rachel Lagiakos, Marie-Isabel Aguilar and Patrick Perlmutter\*

School of Chemistry, Monash University  
Clayton, Victoria, 3800  
Australia

Tel: 613 9905 4522

Fax: 613 9905 4597

patrick.perlmutter@sci.monash.edu.au

## Table of Contents:

|                                                                                        |         |
|----------------------------------------------------------------------------------------|---------|
| General methods.....                                                                   | S3      |
| Preparation and spectroscopic data for compounds <b>6a</b> and <b>7a</b> .....         | S4-S5   |
| Spectroscopic data for compounds <b>6b</b> and <b>7b</b> .....                         | S6      |
| Spectroscopic data for compounds <b>6c</b> , <b>6d</b> and <b>7d</b> .....             | S7      |
| Spectroscopic data for compounds <b>6e</b> , <b>7e</b> , <b>6f</b> and <b>6g</b> ..... | S8-S9   |
| Preparation and spectroscopic data for compound <b>6h</b> .....                        | S9-S10  |
| Spectroscopic data for compound <b>9</b> .....                                         | S10     |
| Spectroscopic data for compound <b>10</b> .....                                        | S11     |
| Procedure for diastereomeric product determination.....                                | S11     |
| References.....                                                                        | S11     |
| <sup>1</sup> H NMR and <sup>13</sup> C NMR Spectra of compound <b>6a</b> .....         | S12-S13 |
| <sup>1</sup> H NMR and <sup>13</sup> C NMR Spectra of compound <b>7a</b> .....         | S14-S15 |
| <sup>1</sup> H NMR and <sup>13</sup> C NMR Spectra of compound <b>6b</b> .....         | S16-S17 |
| <sup>1</sup> H NMR and <sup>13</sup> C NMR Spectra of compound <b>7b</b> .....         | S18-S19 |
| <sup>1</sup> H NMR and <sup>13</sup> C NMR Spectra of compound <b>6c</b> .....         | S20-S21 |
| <sup>1</sup> H NMR and <sup>13</sup> C NMR Spectra of compound <b>6f</b> .....         | S22-S23 |
| <sup>1</sup> H NMR and <sup>13</sup> C NMR Spectra of compound <b>6g</b> .....         | S24-S25 |
| <sup>1</sup> H NMR and <sup>13</sup> C NMR Spectra of compound <b>6h</b> .....         | S26-S27 |
| <sup>1</sup> H NMR and <sup>13</sup> C NMR Spectra of compound <b>9</b> .....          | S28-S29 |
| <sup>1</sup> H NMR and <sup>13</sup> C NMR Spectra of compound <b>10</b> .....         | S30-S31 |

## General Methods

Melting points were determined using a hot stage melting point apparatus. Optical Rotations were obtained using an automatic polarimeter, using 1dm cell with chloroform as the solvent, at a wavelength of 589 nm (sodium D line), and are quoted as  $[\alpha]_D$ , concentration  $c$  (g/100 mL) and recorded at room temperature. Proton nuclear magnetic resonance ( $^1\text{H}$  NMR) spectra were recorded on a 300 MHz or 400 MHz spectrometer. The  $^1\text{H}$  spectra were run in deuteriochloroform ( $\text{CDCl}_3$ ) with  $\delta$  7.26 (residual  $\text{CHCl}_3$ ) used as an internal reference. Carbon nuclear magnetic resonance ( $^{13}\text{C}$  NMR) spectra were recorded at 75 MHz or at 100 MHz with a 300 MHz or 400 MHz spectrometer and were run in deuteriochloroform ( $\text{CDCl}_3$ ) solutions with  $\delta$  77.16 ( $\text{CDCl}_3$  solvent resonance) used as an internal reference. Accurate mass determinations were made at high resolution on an accurate mass LC-TOF system; ESI Conditions: 6L/min  $\text{N}_2$ , 325 °C drying gas temp., capillary voltage: 3500v, Fragmentor voltage: 150v. Infrared (IR) spectra were recorded neat on a FTIR equipped with a diamond ATR ( $\text{cm}^{-1}$  scale) and MCT detector. Analytical thin layer chromatography (TLC) was performed on silica gel 60  $\text{F}_{254}$ . Detection was by UV light or stained using potassium permanganate dip. Flash Chromatography was performed using silica gel 60 (230-400 mesh).

Dichloromethane was distilled over  $\text{P}_2\text{O}_5$ . Triethylamine ( $\text{NEt}_3$ ) was distilled over sodium wire. Trimethylsilyl trifluoromethanesulfonate ( $\text{TMSOTf}$ ) and other commercially available reagents were purchased and used as received. All reactions were carried out under an argon atmosphere.

*N,O*-diacyl hydroxylamine starting materials were prepared according to the literature.<sup>1</sup>

**General [3,3] sigmatropic rearrangement procedure using a 1:1 ratio of TMSOTf to NEt<sub>3</sub>:** Preparation of 2-(methyldamino)-2-oxo-1-phenylethyl benzoate (**6a**)

*N*-(benzoyloxy)-*N*-methyl-2-phenylacetamide (**5a**) (200 mg, 0.743 mmol) was dissolved in 3 mL dry DCM and the temperature lowered to -78 °C. To this, TMSOTf (135 µL, 0.743 mmol) was added, followed 5 min later by NEt<sub>3</sub> (104 µL, 0.743mmol). After stirring at this temperature for 30 min, the reaction was removed from the cooling bath, allowed to warm to room temperature, sealed and left to stir overnight. The reaction was quenched by pouring directly onto a silica gel plug and eluted with EtOAc. Solvent removal *in vacuo* left a white solid which upon spectroscopic analysis, proved to be pure **6a** (150 mg, 75%).

In all other examples where a mixture of products **6** and **7** were present, a crude <sup>1</sup>H NMR after the plug was used to determine product ratios. Then further column chromatography to separate the two products was undertaken.

**General [3,3] sigmatropic rearrangement procedure using a 2:2 ratio of TMSOTf to NEt<sub>3</sub>:** Preparation of 3-methyl-2,5-diphenyl-2-(trimethylsilyloxy)oxazolidin-4-one (**7a**)

*N*-(benzoyloxy)-*N*-methyl-2-phenylacetamide (**5a**) (100 mg, 0.371 mmol) was dissolved in 1.5 mL dry DCM and the temperature lowered to -78 °C. To this, TMSOTf (135 µL, 0.743 mmol) was added, followed 5 min later by NEt<sub>3</sub> (104 µL, 0.743 mmol). After stirring at this temperature for 30 min, the reaction was removed from the cooling bath, allowed to warm to room temperature, sealed and left to stir overnight. The reaction was quenched by pouring directly onto a silica gel plug and eluted with EtOAc. Solvent removal *in vacuo* left a white solid which upon spectroscopic analysis, showed a 10:1 mixture of **7a:6a** in a combined 90% yield. Column chromatography (20% EtOAc/Hexane) afforded **7a** as a white solid (102 mg, 80%).

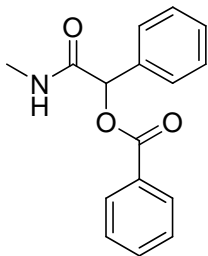

**2-(methylamino)-2-oxo-1-phenylethyl benzoate (6a)**

mp 142-143 °C;  $^1\text{H}$  NMR (300 MHz,  $\text{CDCl}_3$ )  $\delta$  8.10-8.14 (2H, m), 7.28-7.65 (8H, m), 6.37 (1H, s), 6.20 (1H, brs), 2.90 (3H, d,  $J=4.8$ );  $^{13}\text{C}$  NMR (75 MHz,  $\text{CDCl}_3$ ) 169.1, 165.1, 135.8, 133.8, 130.0, 129.5, 128.9, 128.8, 128.8, 127.5, 76.1, 26.4; FT-IR  $\nu_{\text{max}}/\text{cm}^{-1}$  3311s, 3092w, 3065w, 3036w, 2949w, 1725vs, 1661vs, 1561s, 1496m, 1449m, 1315s, 1245vs, 1113s, 1025m, 985m, 708m, 683m; ESI-HRMS  $m/z$  270.1124, 292.0947 ( $\text{C}_{16}\text{H}_{15}\text{NO}_3 + \text{H}^+$  requires 270.1130,  $\text{C}_{16}\text{H}_{15}\text{NO}_3 + \text{Na}^+$  requires 292.0950).

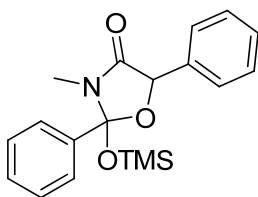

**3-methyl-2,5-diphenyl-2-(trimethylsilyloxy)oxazolidin-4-one (7a)**

mp 62-63 °C;  $^1\text{H}$  NMR (400 MHz,  $\text{CDCl}_3$ )  $\delta$  7.20-7.62 (10H, m), 5.52 (1H, s), 2.70 (3H, s), 0.22 (9H, s);  $^{13}\text{C}$  NMR (100 MHz,  $\text{CDCl}_3$ ) 169.5, 139.5, 135.5, 129.5, 128.9, 128.7, 128.7, 128.4, 127.0, 126.9, 126.8, 110.7, 78.6, 25.7, 1.2; FT-IR  $\nu_{\text{max}}/\text{cm}^{-1}$  3035w, 2957w, 1716s, 1424m, 1231m, 1090m, 1062m, 1035m, 869m, 839m, 760m, 698m; ESI-HRMS  $m/z$  342.1519 ( $\text{C}_{19}\text{H}_{23}\text{NO}_3\text{Si} + \text{H}^+$  requires 342.1525).

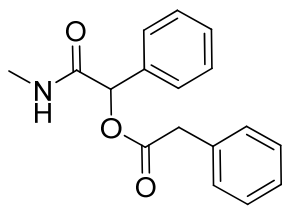

**2-(methylamino)-2-oxo-1-phenylethyl 2-phenylacetate (6b)**

mp 91-93 °C;  $^1\text{H}$  NMR (400 MHz,  $\text{CDCl}_3$ )  $\delta$  7.26-7.40 (10H, m), 6.10 (1H, s), 5.73 (1H, brs), 3.76 (2H, s), 2.7 (3H, d,  $J=4.8$ );  $^{13}\text{C}$  NMR (100 MHz,  $\text{CDCl}_3$ ) 169.5, 168.9, 135.5, 133.6, 129.4, 129.0, 129.0, 128.8, 127.6, 127.4, 75.7, 41.6, 26.1; FT-IR  $\nu_{\text{max}}/\text{cm}^{-1}$  3302s, 3092w, 3064w, 3032w, 2947w, 2917w, 1732s, 1663vs, 1566m, 1498m, 1453m, 1410m, 1355m, 1191m, 1155s, 866m; ESI-HRMS  $m/z$  284.1281 ( $\text{C}_{17}\text{H}_{17}\text{NO}_3 + \text{H}^+$  requires 284.1287).

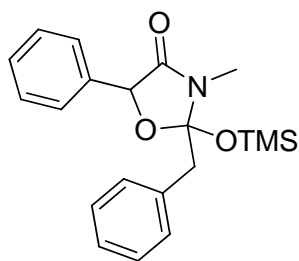

**2-benzyl-3-methyl-5-phenyl-2-(trimethylsilyloxy)oxazolidin-4-one (7b)**

$^1\text{H}$  NMR (400 MHz,  $\text{CDCl}_3$ )  $\delta$  7.16-7.26 (8H, m), 6.98-7.00 (2H, m), 5.25 (1H, s), 3.21 (2H, s), 2.97 (3H, s), 0.15 (9H, s);  $^{13}\text{C}$  NMR (100 MHz,  $\text{CDCl}_3$ ) 170.3, 135.4, 134.6, 131.0, 130.5, 128.7, 128.6, 128.5, 128.4, 127.5, 127.2, 127.1, 111.6, 79.2, 45.7, 26.2, 1.1; FT-IR  $\nu_{\text{max}}/\text{cm}^{-1}$  3089w, 3064m, 3032m, 2957m, 2930m, 2899m, 1719vs, 1453m, 1432s, 1395s, 1252s, 1162m, 1087s, 1070s, 1017m, 840s, 697m, 638m; ESI-HRMS  $m/z$  356.1674 ( $\text{C}_{20}\text{H}_{25}\text{NO}_3\text{Si} + \text{H}^+$  requires 356.1682).

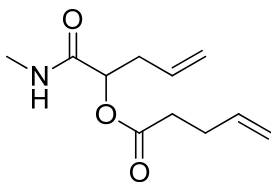

**1-(methylamino)-1-oxopent-4-en-2-yl hex-5-enoate (6c)**

$^1\text{H}$  NMR (400 MHz,  $\text{CDCl}_3$ )  $\delta$  6.08 (1H, br), 5.84 (1H, dddd,  $J=6.4, 10.2, 12.5, 16.7$ ), 5.71 (1H, dddd,  $J=7.1, 10.2, 14.2, 17.1$ ), 5.27 (1H, dd,  $J=4.7, 7$ ), 5.06-5.13 (4H, m), 2.82 (3H, d,  $J=3.8$ ), 2.65-2.71 (1H, m), 2.53-2.60 (1H, m), 2.48-2.52 (2H, m), 2.40-2.44 (2H, m);  $^{13}\text{C}$  NMR (100 MHz,  $\text{CDCl}_3$ ) 171.6, 169.8, 136.7, 132.4, 118.9, 116.0, 73.2, 36.4, 33.6, 28.9, 26.0; FT-IR  $\nu_{\text{max}}/\text{cm}^{-1}$  3306br, 3080m, 2980m, 2942m, 1742vs, 1660vs, 1543s, 1370m, 1243m, 1160m, 918m, 843m; ESI-HRMS  $m/z$  212.1282 ( $\text{C}_{11}\text{H}_{17}\text{NO}_3 + \text{H}^+$  requires 212.1287).

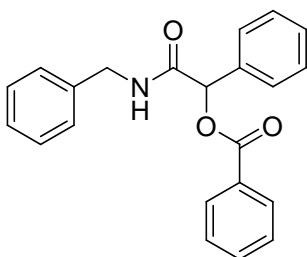

**2-(benzylamino)-2-oxo-1-phenylethyl benzoate (6d)<sup>2</sup>**

$^1\text{H}$  NMR (400 MHz,  $\text{CDCl}_3$ )  $\delta$  7.21–8.19 (15H, m), 6.46 (1H, br), 6.39 (1H, s), 4.56 (1H, dd,  $J=5.8, 15.2$ ), 4.48 (1H, dd,  $J=5.9, 15.2$ ).

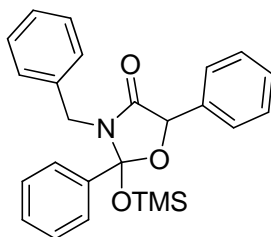

**3-benzyl-2,5-diphenyl-2-(trimethylsilyloxy)oxazolidin-4-one (7d)<sup>2</sup>**

$^1\text{H}$  NMR (400 MHz,  $\text{CDCl}_3$ )  $\delta$  7.00–7.61 (15H, m), 5.60 (1H, s), 4.43 (1H, d,  $J=15.2$  Hz), 4.21 (1H, d,  $J=15.2$  Hz), 0.88 (s, 9H).

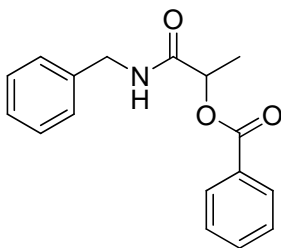

**1-(benzylamino)-1-oxopropan-2-yl benzoate (6e)<sup>2</sup>**

<sup>1</sup>H NMR (400 MHz, CDCl<sub>3</sub>) δ 7.24–8.05 (10H, m), 6.46 (1H, br), 5.54 (1H, q, *J*=6.9), 4.51 (2H, dd, *J*=2.0, 5.9), 1.65 (3H, d, *J*=6.6).

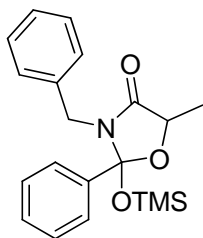

**3-benzyl-5-methyl-2-phenyl-2-(trimethylsilyloxy)oxazolidin-4-one (7e)<sup>2</sup>**

<sup>1</sup>H NMR (400 MHz, CDCl<sub>3</sub>) δ 6.99–7.48 (10H, m), 4.71 (1H, q, *J*=6.7), 4.39 (1H, d, *J*=15.2), 4.10 (1H, d, *J*=15.2), 1.63 (3H, d, *J*=6.8), 0.83 (9H, s).

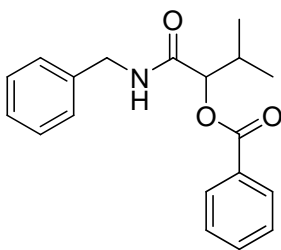

**1-(benzylamino)-3-methyl-1-oxobutan-2-yl benzoate (6f)**

mp 112–113 °C; <sup>1</sup>H NMR (400 MHz, CDCl<sub>3</sub>) δ 8.10–8.13 (1H, m), 8.06–8.08 (2H, m), 7.58–7.63 (1H, m), 7.45–7.49 (3H, m), 7.24–7.33 (3H, m), 5.38 (1H, d, *J*=4), 4.56 (1H, dd, *J*=6, 14.8), 4.44 (1H, dd, *J*=6, 14.8), 2.49–2.53 (1H, m), 1.07 (6H, dd, *J*=7.2, 10.4); <sup>13</sup>C NMR (100 MHz, CDCl<sub>3</sub>) 169.5, 165.7, 138.0, 133.8, 130.3, 129.9, 129.5, 128.9, 128.8, 128.6, 127.7, 127.7, 78.8, 43.4, 31.0, 19.1, 17.2; FT-IR ν<sub>max</sub>/cm<sup>-1</sup> 3257m, 3090m,



2974m, 2936m, 1719s, 1655s, 1562m, 1430m, 1293m, 1248s, 1116m, 992m, 741m, 708m, 677m; ESI-HRMS  $m/z$  312.1597 ( $C_{19}H_{21}NO_3 + H^+$  requires 312.1600).

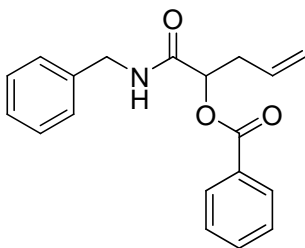

**1-(benzylamino)-1-oxopent-4-en-2-yl benzoate (6g)**

mp 103-104 °C;  $^1H$  NMR (400 MHz,  $CDCl_3$ )  $\delta$  8.12 (1H, d,  $J=7.12$ ), 8.03 (1H, d,  $J=7.8$ ), 7.25-7.63 (8H, m), 6.40 (1H, br), 5.83 (1H, dddd,  $J=7.0, 10.2, 14.2, 17.1$ ), 5.56 (1H, dd,  $J=4.9, 6.8$ ), 5.18 (1H, dm,  $J=17.1$ ), 5.12 (1H, dm,  $J=10.2$ ), 4.56 (1H, dd,  $J=6, 15$ ), 4.46 (1H, dd,  $J=6, 15$ ), 2.74-2.88 (2H, m);  $^{13}C$  NMR (100 MHz,  $CDCl_3$ )  $\delta$  169.2, 165.3, 137.8, 133.7, 132.1, 130.2, 129.8, 129.3, 128.8, 128.5, 127.6, 119.2, 73.67, 43.3, 36.4; FT-IR  $\nu_{max}/cm^{-1}$  3306b, 3066m, 3033m, 2930m, 1722vs, 1662s, 1602w, 1539m, 1452m, 1316w, 1267s, 1176w, 1110m, 1070m, 1027w, 922w, 711m; ESI-HRMS  $m/z$  310.1440 ( $C_{19}H_{19}NO_3 + H^+$  requires 310.1443).

**Preparation of 2-(*tert*-butylamino)-2-oxo-1-phenylethyl benzoate (6h):**

*N*-(benzoyloxy)-*N-tert*-butyl-2-phenylacetamide (40 mg, 0.128 mmol) was dissolved in 1 mL dry DCM and the temperature lowered to -78 °C. To this, TMSOTf (47  $\mu$ L, 0.257 mmol) was added, followed 5 min later by  $NEt_3$  (36  $\mu$ L, 0.257 mmol). After stirring at this temperature for 30 min, the reaction was warmed to room temperature, then heated to reflux and left overnight. The reaction was quenched by pouring directly onto a silica gel plug and eluted with EtOAc. Solvent removal *in vacuo* left an oil which upon spectroscopic analysis, showed approximately 25% conversion to **7h**. A pure sample of **7h** could not be obtained, even after extensive chromatography. Thus spectroscopic data reported here are for an impure sample with only selected resonances included (see scanned spectra for full details).

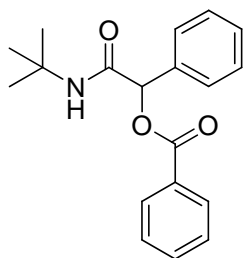

**2-(*tert*-butylamino)-2-oxo-1-phenylethyl benzoate (6h)**

$^1\text{H}$  NMR ( $\text{CDCl}_3$ , 400 MHz)  $\delta$  7.27-8.10 (10H, m), 6.22 (1H, s), 5.97 (1H, brs), 1.37 (9H, s);  $^{13}\text{C}$  NMR ( $\text{CDCl}_3$ , 100 MHz) 167.3, 164.9, 76.1, 51.6, 28.7; ESI-HRMS  $m/z$  312.1594 ( $\text{C}_{19}\text{H}_{22}\text{NO}_3 + \text{H}^+$  requires 312.1600).

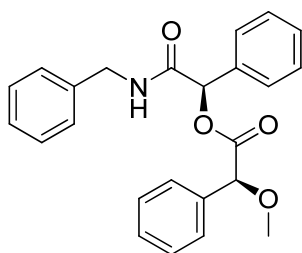

**(S)-((R)-2-(benzylamino)-2-oxo-1-phenylethyl) 2-methoxy-2-phenylacetate (9)**

mp 77-79 °C;  $[\alpha]_{\text{D}}^{25} = -40.0^\circ$  ( $c$  1.0,  $\text{CHCl}_3$ );  $^1\text{H}$  NMR (400 MHz,  $\text{CDCl}_3$ )  $\delta$  7.26-7.32 (13H, m), 7.14-7.16 (2H, m), 6.20 (1H, br), 6.13 (1H, s), 4.89 (1H, s), 4.37 (2H, d,  $J=5.8$ ), 3.40 (3H, s);  $^{13}\text{C}$  NMR (100 MHz,  $\text{CDCl}_3$ ) 169.0, 168.0, 137.7, 135.7, 135.1, 129.1, 129.1, 128.9, 128.9, 128.8, 127.8, 127.2, 127.0, 82.83, 76.0, 57.8, 43.5; FT-IR  $\nu_{\text{max}}/\text{cm}^{-1}$  3297br, 3063m, 3031m, 2928s, 2829w, 1751vs, 1661vs, 1530m, 1495m, 1453m, 1358w, 1259m, 1166s, 1103s, 1028m, 731m, 695s; ESI-HRMS  $m/z$  390.1699 ( $\text{C}_{24}\text{H}_{23}\text{NO}_4 + \text{H}^+$  requires 390.1705).

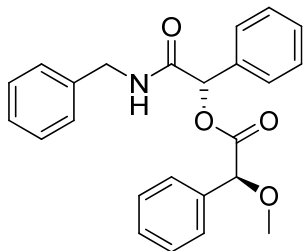

**(S)-((S)-2-(benzylamino)-2-oxo-1-phenylethyl) 2-methoxy-2-phenylacetate (**10**)**

$[\alpha]_D^{25} = 58.9^\circ$  ( $c$  1.0,  $\text{CHCl}_3$ );  $^1\text{H}$  NMR (400 MHz,  $\text{CDCl}_3$ )  $\delta$  7.28-7.41 (12H, m), 7.20-7.23 (3H, m), 6.23 (1H, s), 5.80 (1H, br), 4.83 (1H, s), 4.24 (1H, dd,  $J=6, 14.8$ ), 4.15 (1H, dd,  $J=6, 14.8$ ), 3.38 (3H, s);  $^{13}\text{C}$  NMR (100 MHz,  $\text{CDCl}_3$ ) 168.6, 168.0, 137.6, 135.9, 135.2, 129.2, 128.9, 128.8, 127.8, 127.7, 127.5, 127.2, 82.4, 75.6, 57.6, 43.3; FT-IR  $\nu_{\text{max}}/\text{cm}^{-1}$  3414s, 3308br, 3064m, 3032m, 2930w, 2830s, 1754vs, 1668vs, 1603s, 1527s, 1496s, 1454s, 1359s, 1243s, 1167s, 1109s, 1029w, 1002w, 734m, 697m; ESI-HRMS  $m/z$  390.1702 ( $\text{C}_{24}\text{H}_{23}\text{NO}_4 + \text{H}^+$  requires 390.1705).

**Procedure for diastereomeric product determination**

*N*-benzyl-(*S*)-mandelamide (100 mg, 0.414 mmol), (*S*)-(*O*-methyl)mandelic acid (69 mg, 0.414 mmol), EDCI.HCl (240 mg, 1.243 mmol) and DMAP (152 mg, 1.243 mmol) were all combined and dissolved in 3 mL DCM. The reaction was left stirring overnight at room temperature, then quenched with water. The layers were separated, and the organics washed with 1M HCl, then brine. The solvent was removed *in vacuo* and the crude material was purified using column chromatography (40% EtOAc/Hexane) to give **10** in 85% yield. Spectral data was identical with that of the rearranged material.

**References**

1. Clark, A. J.; Al-Faiyaz, Y. S. S.; Broadhurst, M. J. Patel, D.; Peacock, J. L. *J. Chem. Soc., Perkin Trans. 1.* **2000**, 1117-1127.
2. Kamimura, A.; Omata, Y.; Kakehi, A.; Shirai, M. *Tetrahedron.* **2002**, 58, 8763-8770.

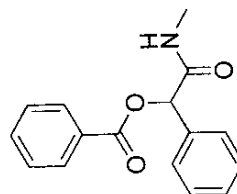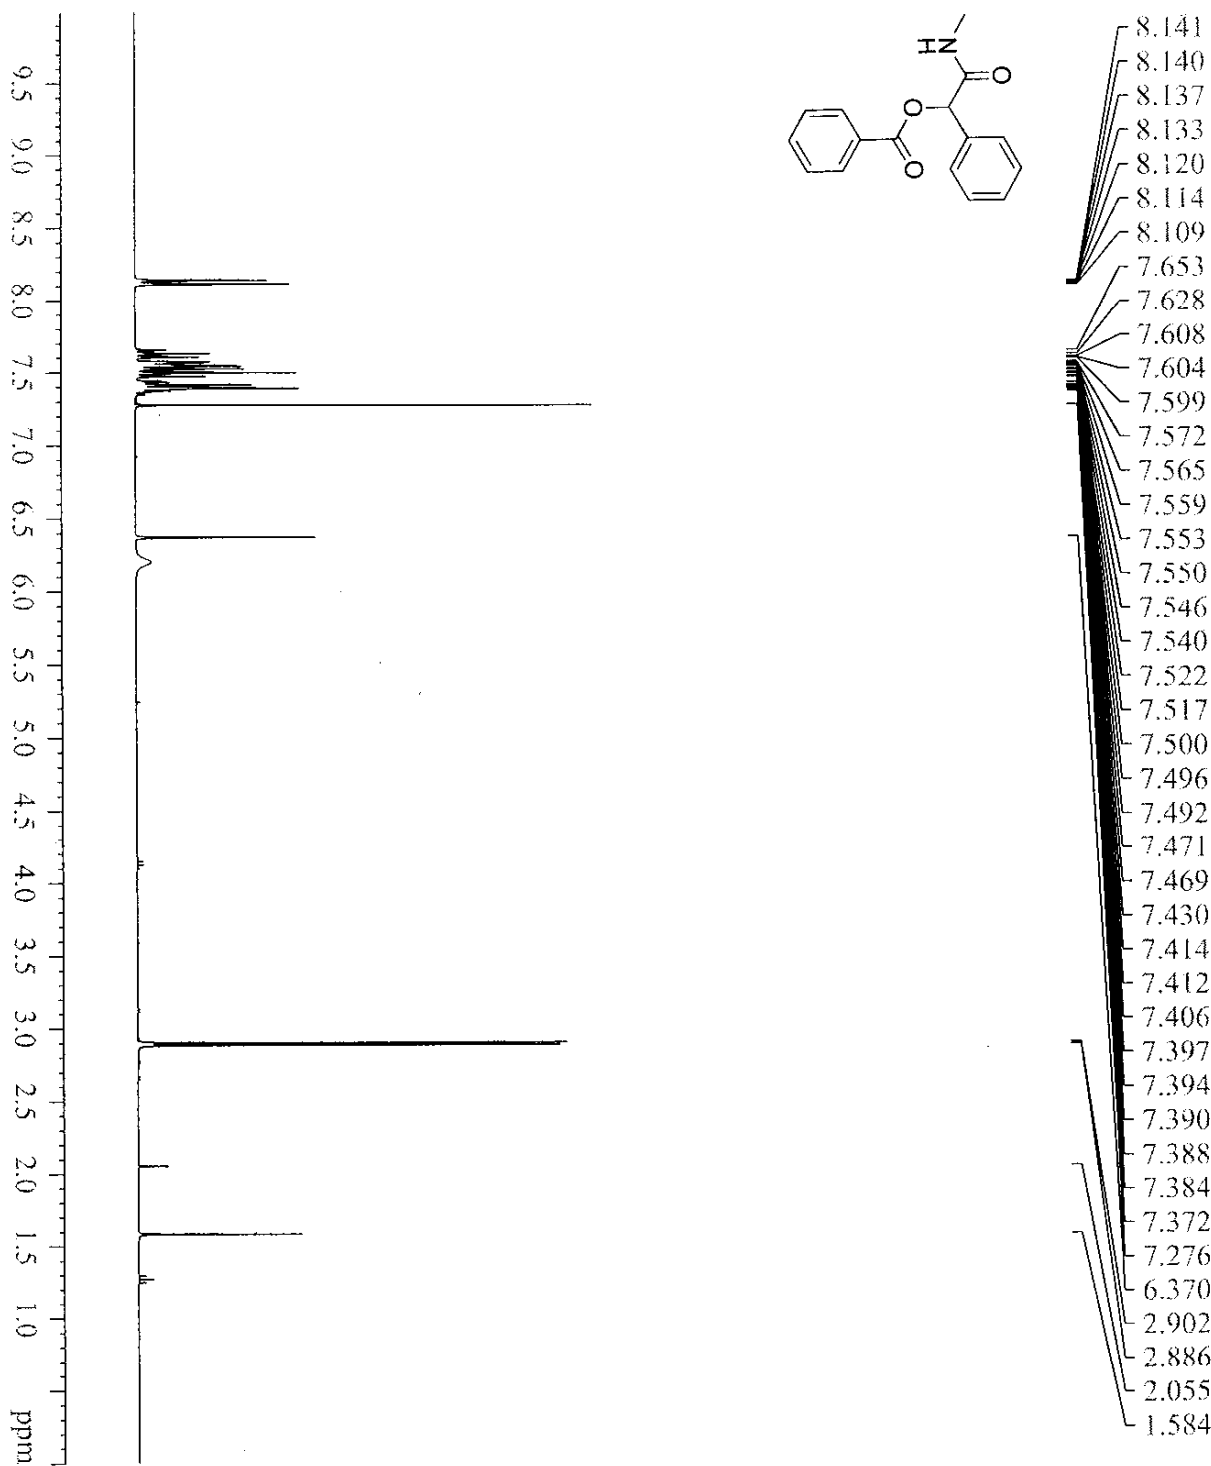

HRL-4-97 recryst from EtOAc

Current Data Parameters  
NAME hrl-4-97-solid  
EXPNO 1  
PROCNO 1

F2 - Acquisition Parameters  
Date\_ 20090404  
Time 14.11  
INSTRUM spect  
PROBHD 5 mm QNP 1H/13  
PULPROG zg30  
TD 32768  
SOLVENT CDCl3  
NS 64  
DS 2  
SWH 8997.806 Hz  
FIDRES 0.274439 Hz  
AQ 1.8219508 sec  
RG 724.1  
DW 55.600 usec  
DE 15.00 usec  
TE 303.2 K  
D1 2.00000000 sec  
TD0 1

===== CHANNEL f1 =====  
NUC1 1H  
P1 9.50 usec  
PL1 -2.00 dB  
SFO1 300.1315757 MHz

F2 - Processing Parameters  
SI 32768  
SF 300.1300021 MHz  
WDW EM  
SSB 0  
LB 0.00 Hz  
GB 0  
PC 1.40

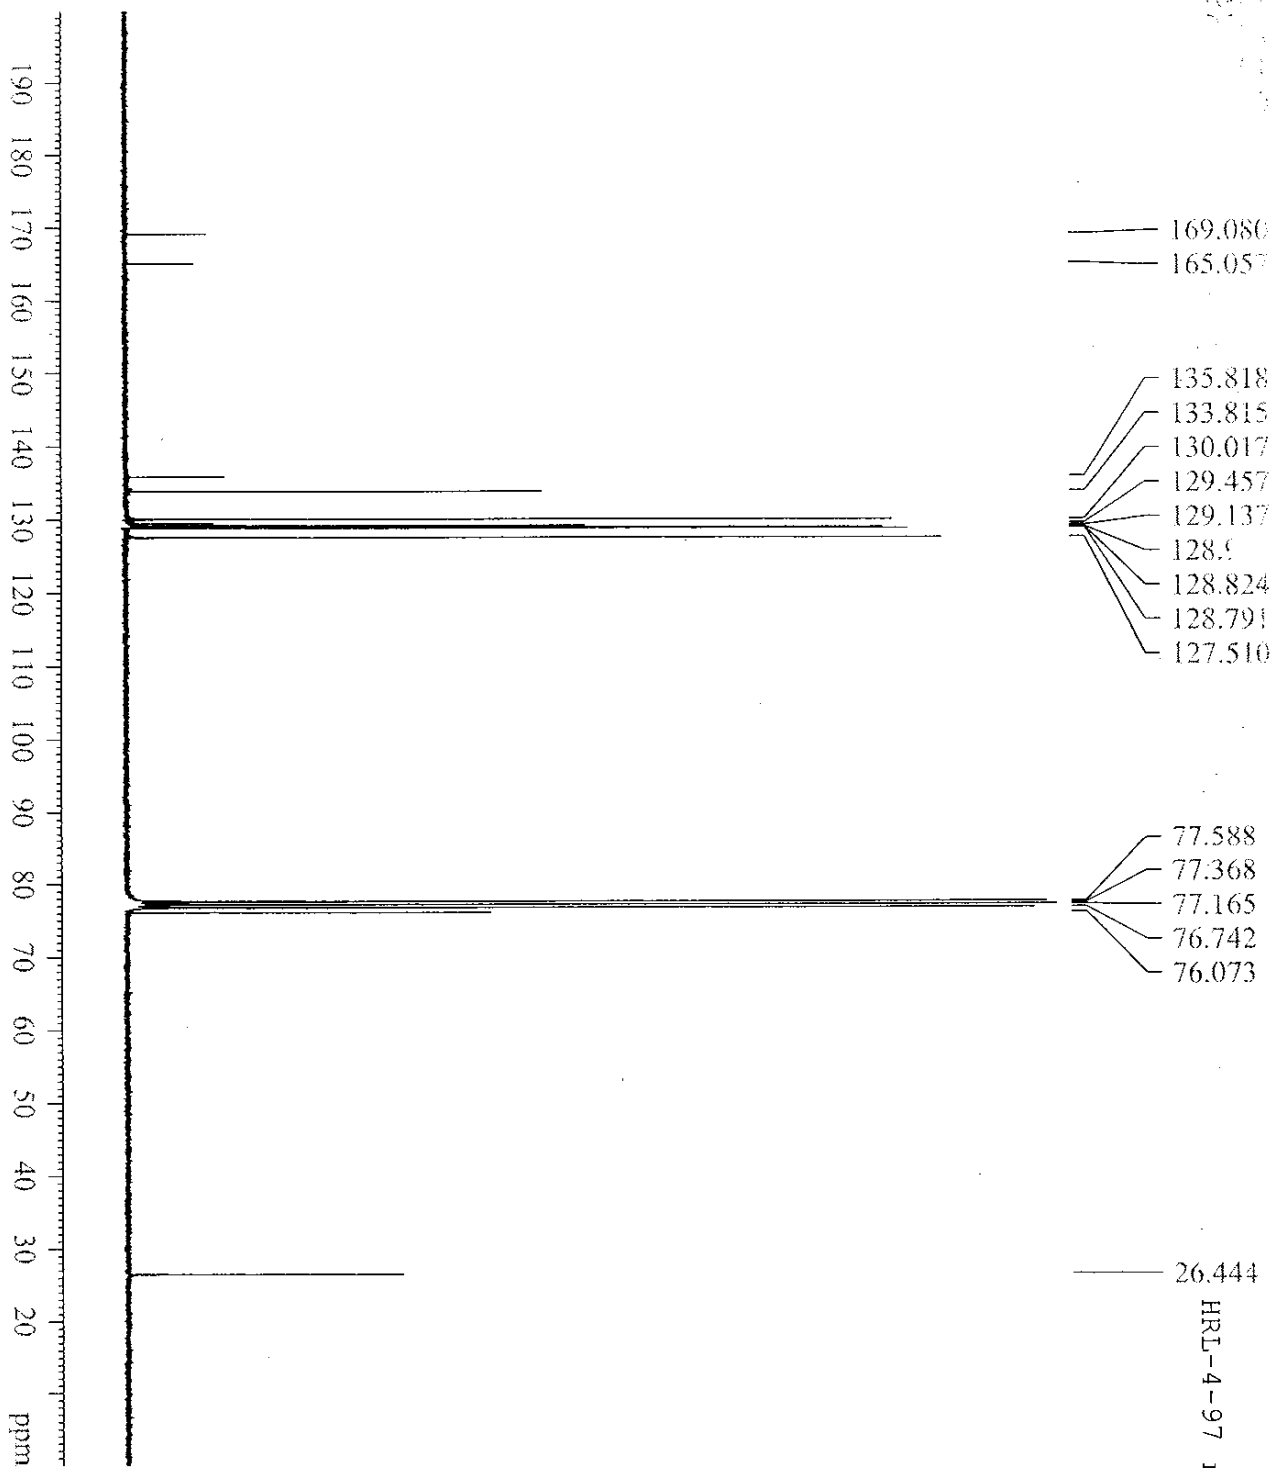

HRL-4-97 recryst from EtOAc

Current Data Parameters  
NAME hrl-4-97-solid  
EXPNO 4  
PROCNO 1

F2 - Acquisition Parameters  
Date\_ 20090405  
Time 17.21  
INSTRUM spect  
PROBHD 5 mm QNP 1H/13  
PULPROG zgpg  
TD 32768  
SOLVENT DMSO  
NS 14421  
DS 2  
SWH 18382.354 Hz  
FIDRES 0.560985 Hz  
AQ 0.8913396 sec  
RG 1824.6  
DW 27.200 usec  
DE 20.00 usec  
TE 303.2 K  
D1 4.00000000 sec  
d11 0.03000000 sec  
TD0 1

===== CHANNEL f1 =====  
NUC1 13C  
P1 8.50 usec  
PL1 0.00 dB  
SFO1 75.4760136 MHz

===== CHANNEL f2 =====  
CPDPRG2 waltz16  
NUC2 1H  
PCPD2 100.00 usec  
PL2 -2.00 dB  
PL12 15.00 dB  
SFO2 300.1314000 MHz

F2 - Processing parameters  
SI 32768  
SF 75.4677366 MHz  
WDW EM  
SSB 0  
LB 0.50 Hz  
GB 0  
PC 1.40

<sup>1</sup>H NMR (400 MHz, CDCl<sub>3</sub>) **7a**

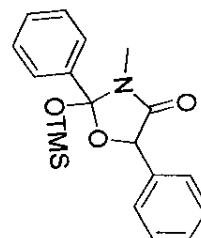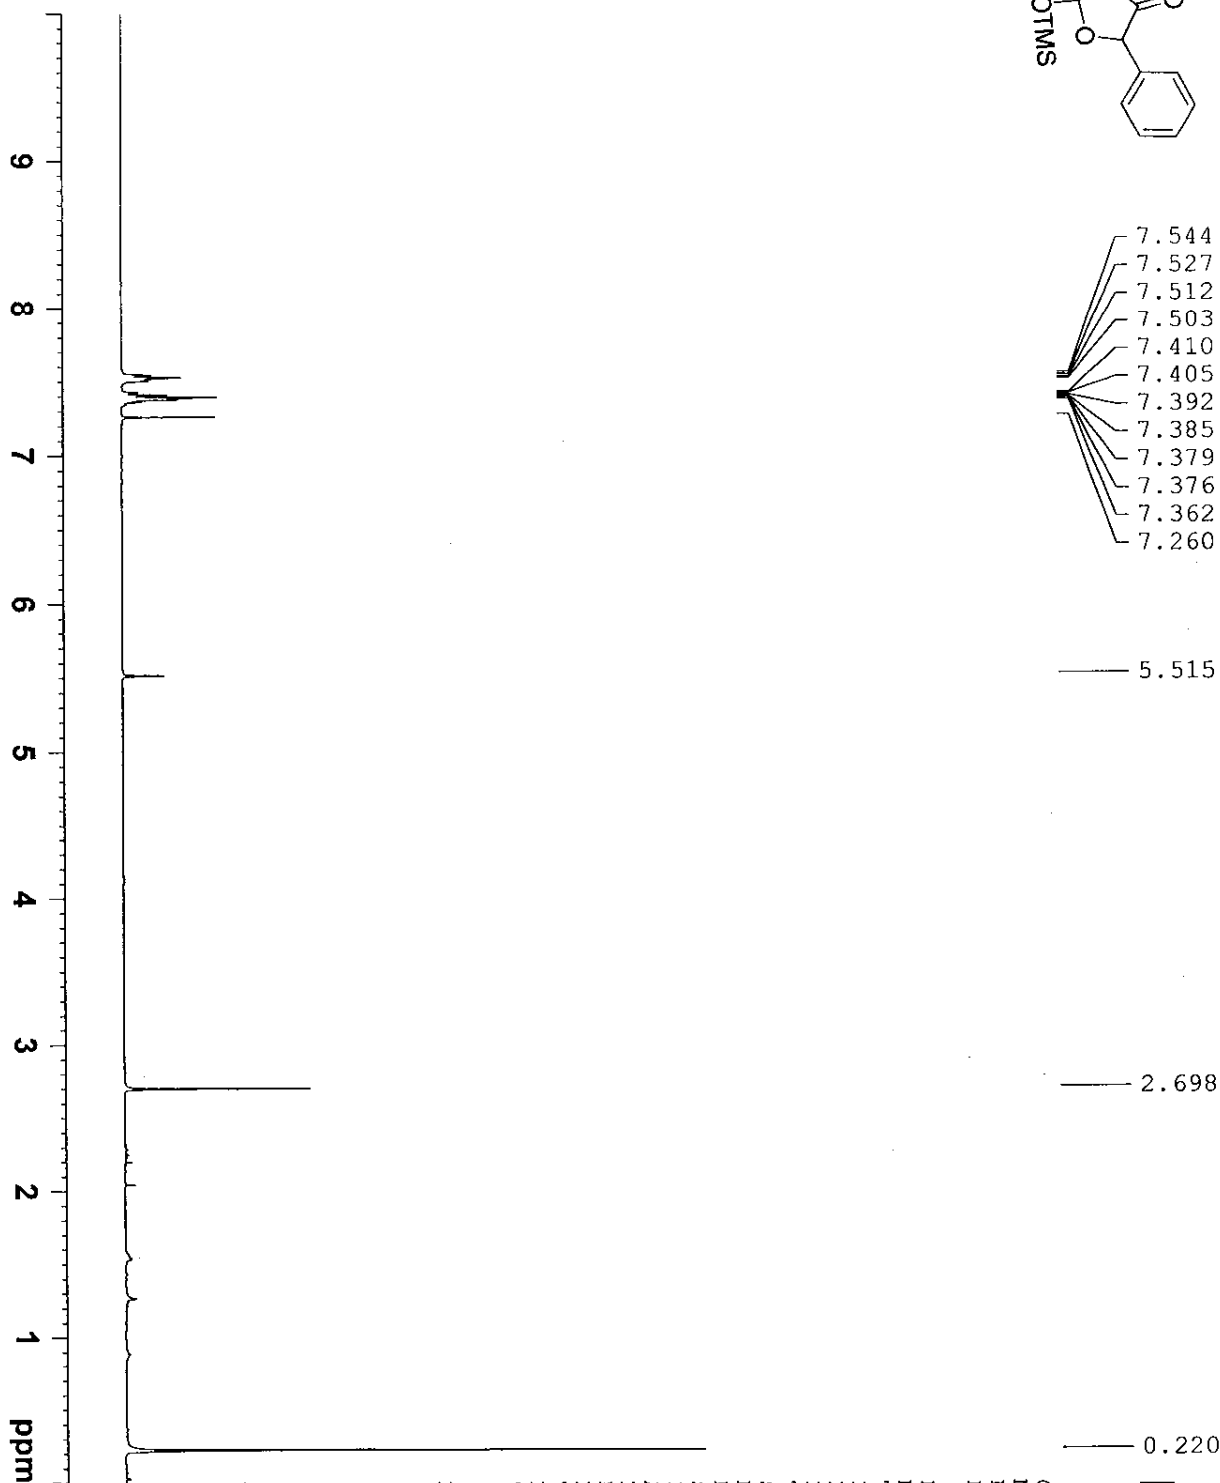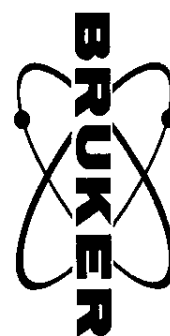

Current Data Parameters  
NAME hrl-4-98  
EXPNO 1  
PROCNO 1

F2 - Acquisition Parameters  
Date\_ 20090330  
Time 16.59  
INSTRUM spect  
PROBHD 5 mm 1H/2H  
PULPROG zg  
TD 48076  
SOLVENT CDCl3  
NS 16  
DS 2  
SWH 4807.692 Hz  
FIDRES 0.100002 Hz  
AQ 4.9999542 sec  
RG 114  
DE 104.000 usec  
TE 303.2 K  
D1 5.00000000 sec  
TD0 1

==== CHANNEL f1 =====  
NUC1 1H  
P1 8.00 usec  
PL1 1.95 dB  
PL1W 9.58740711 W  
SFO1 400.1322007 MHz  
F2 - Processing parameters  
SI 32768  
SF 400.1300099 MHz  
WDW EM  
SSB 0  
LB 0.30 Hz  
GB 0  
PC 1.00

HRL-4-98 2eq.

Current Data Parameters  
NAME hrl-4-98  
EXPNO 2  
PROCNO 1

F2 - Acquisition Parameters  
Date\_ 20090330  
Time 17.05  
INSTRUM spect  
PROBHD 5 mm 5mm 1H/2H  
PULPROG jmod  
TD 65536  
SOLVENT CDCl<sub>3</sub>  
NS 7268  
DS 4  
SWH 25000.000 Hz  
FIDRES 0.381470 Hz  
AQ 1.3107700 sec  
RG 2050  
DW 20.000 usec  
DE 15.00 usec  
TE 303.2 K  
CNST2 145.0000000  
CNST11 1.0000000  
D1 6.0000000 sec  
D20 0.00689655 sec  
TD0 1

===== CHANNEL f1 =====  
NUC1 <sup>13</sup>C  
P1 12.20 usec  
P2 24.40 usec  
PL1 0.00 dB  
PL1W 95.45168304 W  
SFO1 100.6230043 MHz

===== CHANNEL f2 =====  
CPDPRG2 waltz16  
NUC2 <sup>1</sup>H  
PCPD2 100.00 usec  
PL2 2.00 dB  
PL12 23.16 dB  
PL2W 9.47766113 W  
PL12W 0.07256065 W  
SFO2 400.1320000 MHz

F2 - Processing parameters  
SI 65536  
SF 100.6127525 MHz  
WDW EM  
SSB 0  
LB 1.00 Hz  
GB 0  
PC 1.00

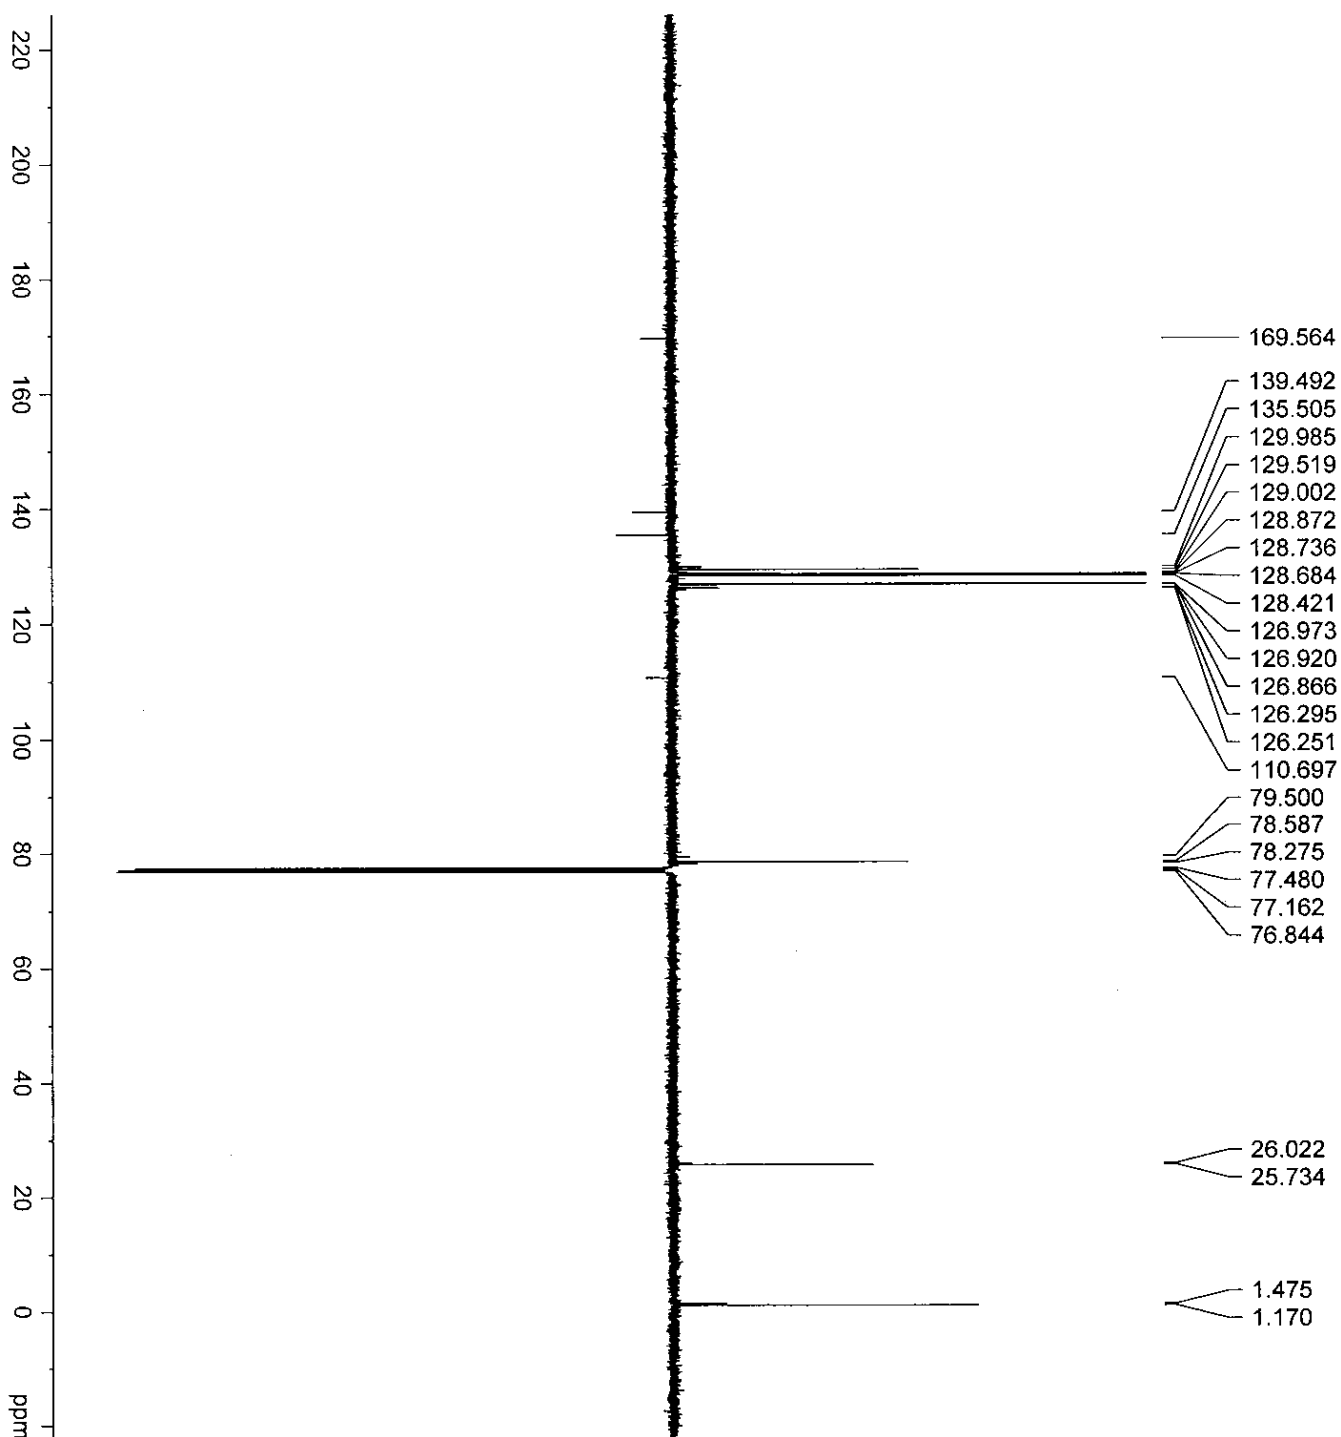

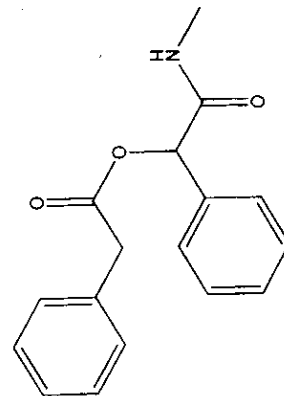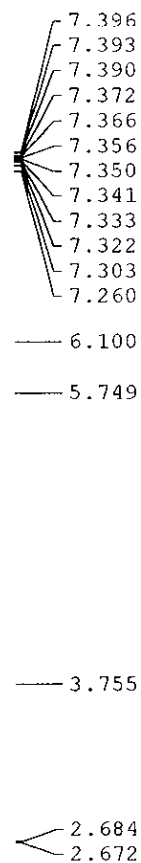

Avance III -1H Spectrum

<sup>1</sup>H NMR (400 MHz, CDCl<sub>3</sub>) **6b**

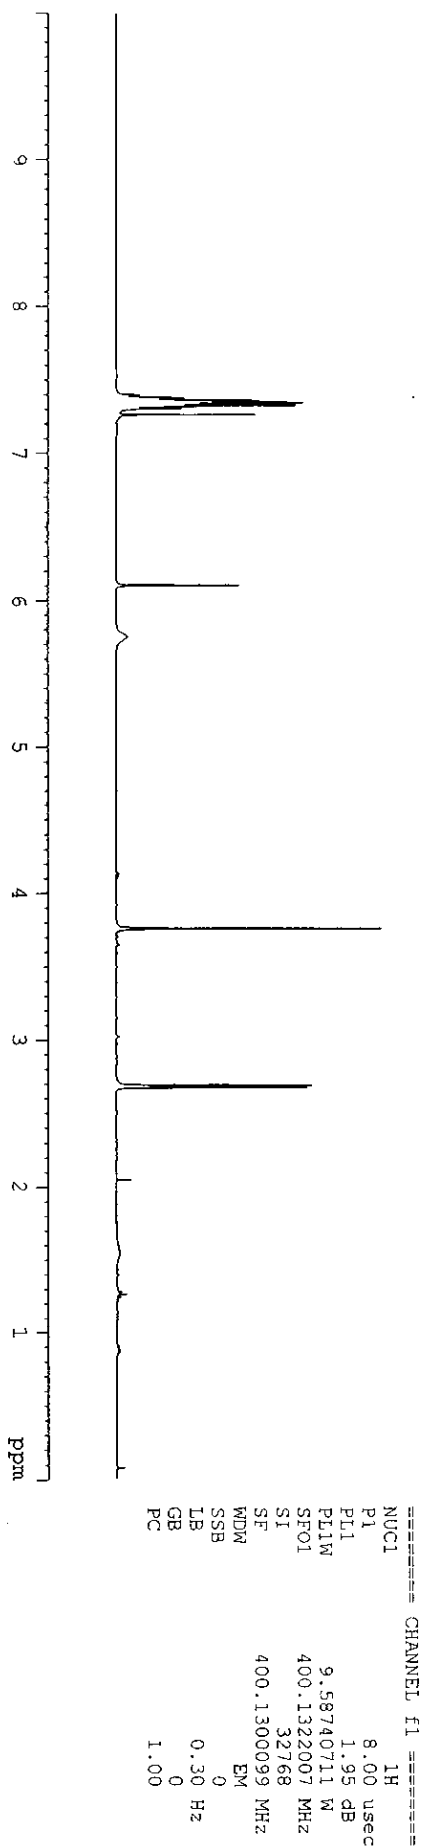



<sup>13</sup>C NMR (100 MHz, CDCl<sub>3</sub>) **6b**

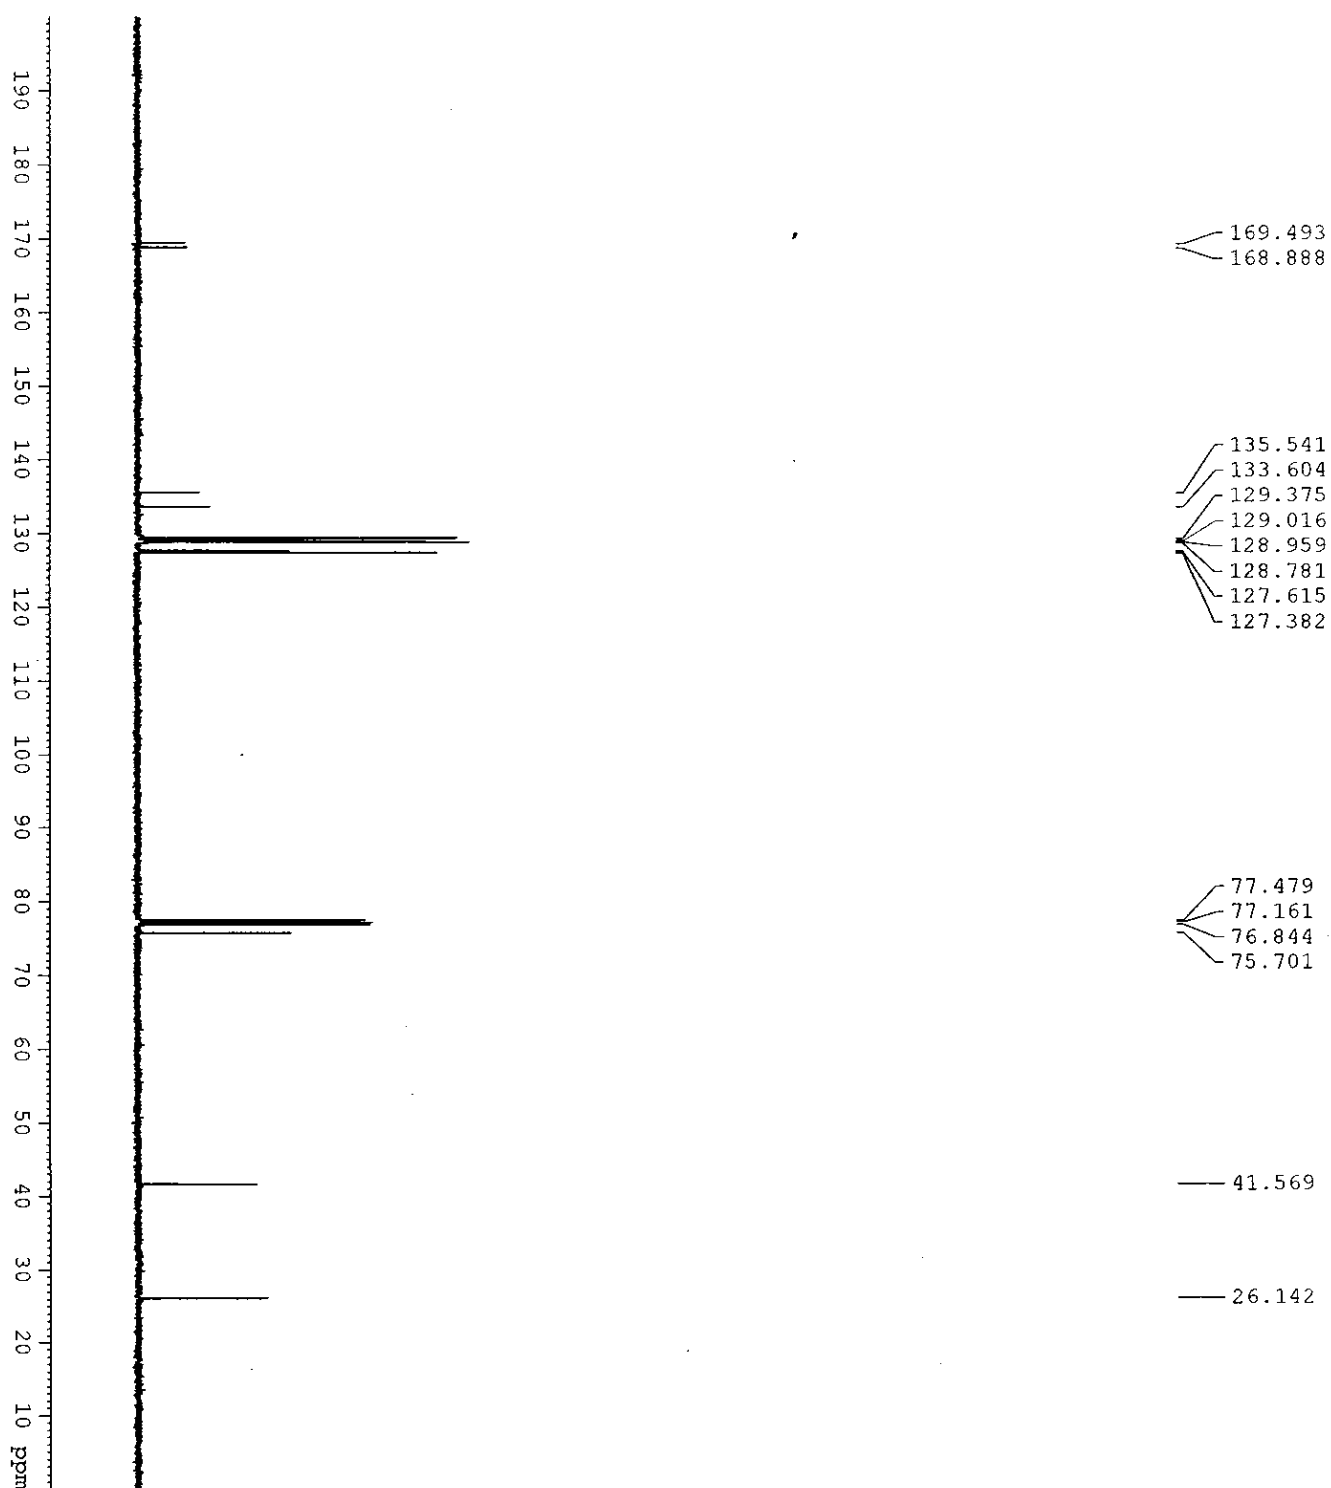

NAME hrl-5-35

EXENO 3

PROCNO 1

Date 20090723

Time 14.01

INSTRUM spect

PROBHD 5 mm 1H/2H

PULPROG zgpg30

TD 65536

SOLVENT CDCl3

NS 565

DS 4

SWH 22059.824 Hz

FIDRES 0.336591 Hz

AQ 1.4855326 sec

RG 2050

DM 22.667 usec

DE 12.00 usec

TE 303.2 K

D1 2.00000000 sec

D11 0.03000000 sec

TD0 1

===== CHANNEL f1 =====

NUC1 13C

P1 14.00 usec

PL1 0.00 dB

PL1W 95.45168304 W

SFO1 100.6223263 MHz

===== CHANNEL f2 =====

CPDPRG2 waltz16

NUC2 1H

PCPD2 80.00 usec

PL2 1.95 dB

PL12 22.20 dB

PL13 28.00 dB

PL2W 9.58740711 W

PL12W 0.09051095 W

PL13W 0.02380681 W

SFO2 400.1316005 MHz

SI 32768

SF 100.6127585 MHz

WDW EM

SSB 0

LB 1.00 Hz

GB 0

PC 1.40

<sup>1</sup>H NMR (400 MHz, CDCl<sub>3</sub>) **7b**

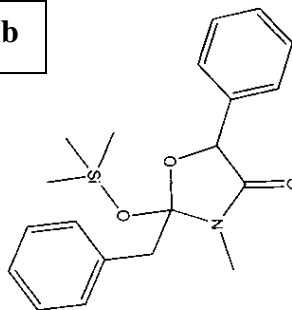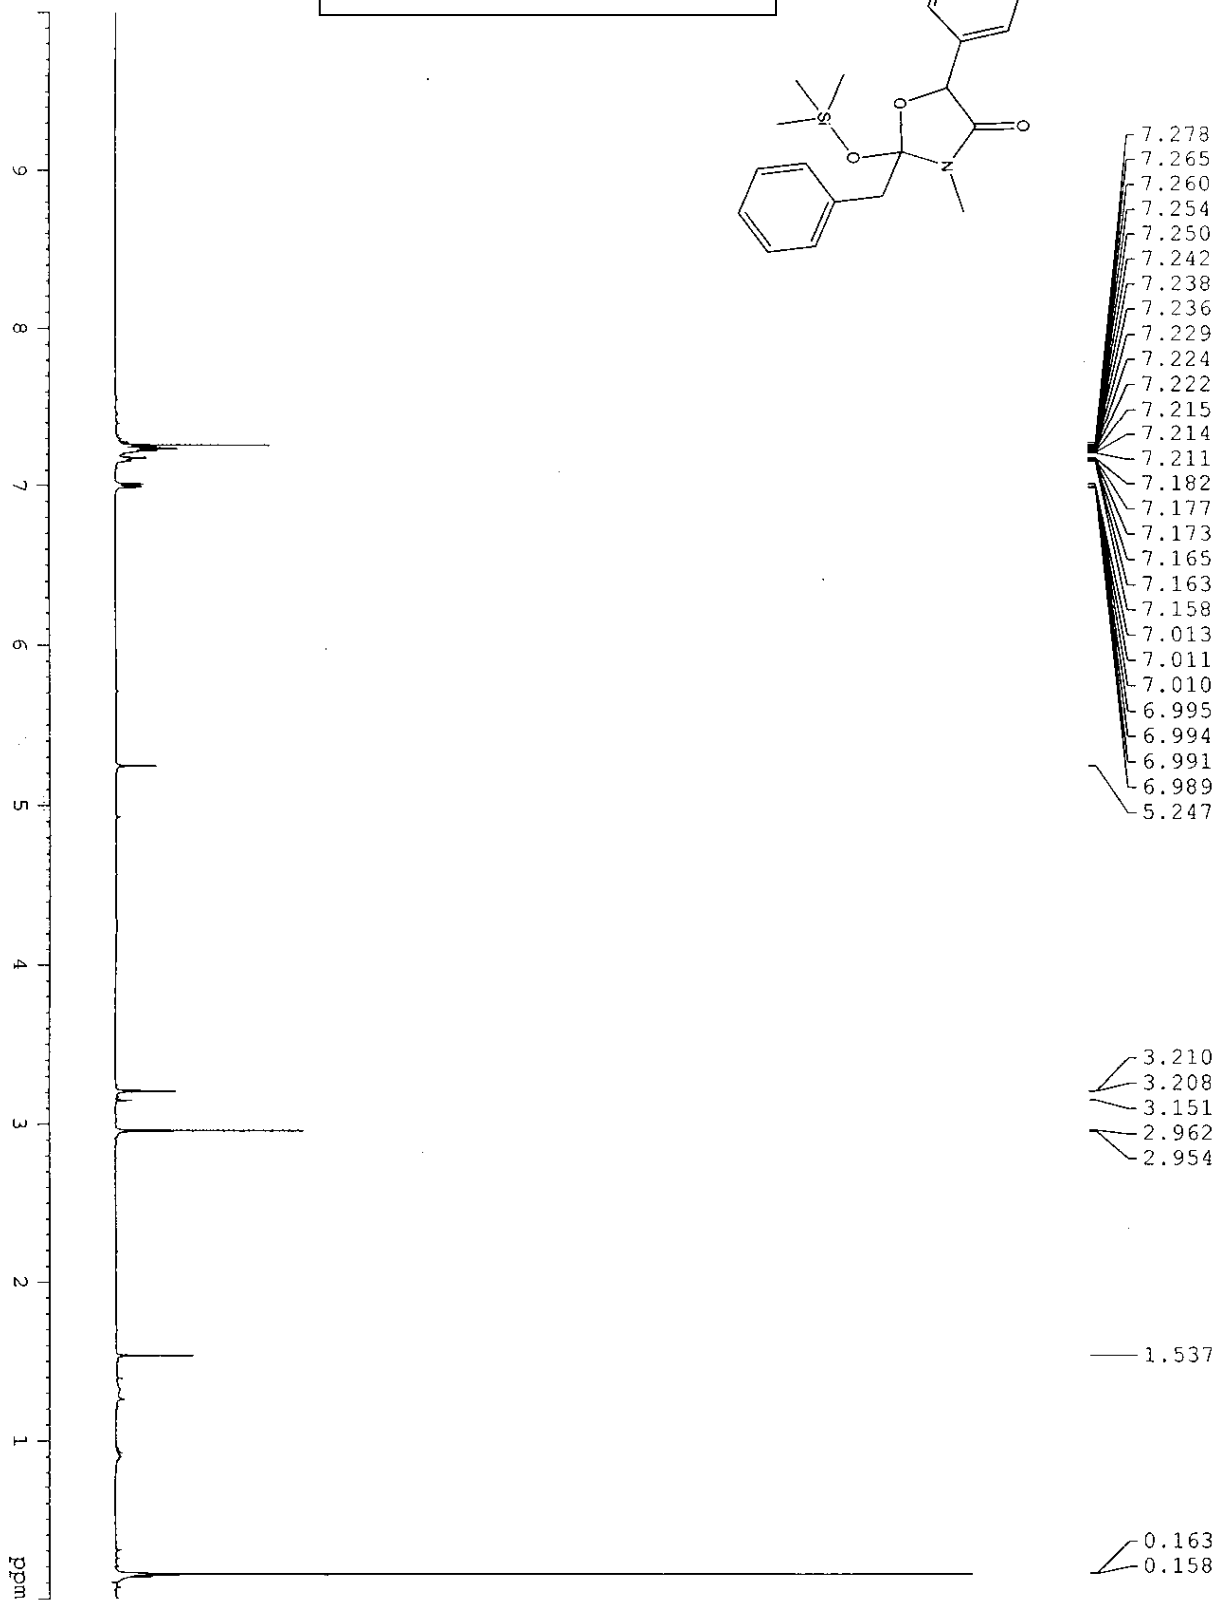

Avance III -1H Spectrum

```
NAME          hrl-5-39c
EXPNO         4
PROCNO        1
Date_         20090728
Time          20.36
INSTRUM       spect
PROBHD        5 mm 5mm 1H/2H
PULPROG       zg
TD            48976
SOLVENT       CDCl3
NS            8
DS            2
SWH           4807.692 Hz
FIDRES        0.100002 Hz
AQ            4.9999542 sec
RG            161
DE            104.000 usec
TE            303.2 K
D1            5.00000000 sec
TD0           1

===== CHANNEL f1 =====
NUC1          1H
P1            8.00 usec
PL1          1.95 dB
PL1W          9.58740711 W
SFO1          400.132007 MHz
SI            32768
SF            400.1300098 MHz
WDW           EM
SSB           0
LB            0.30 Hz
GB            0
PC            1.00
```

<sup>13</sup>C NMR (100 MHz, CDCl<sub>3</sub>) 7b

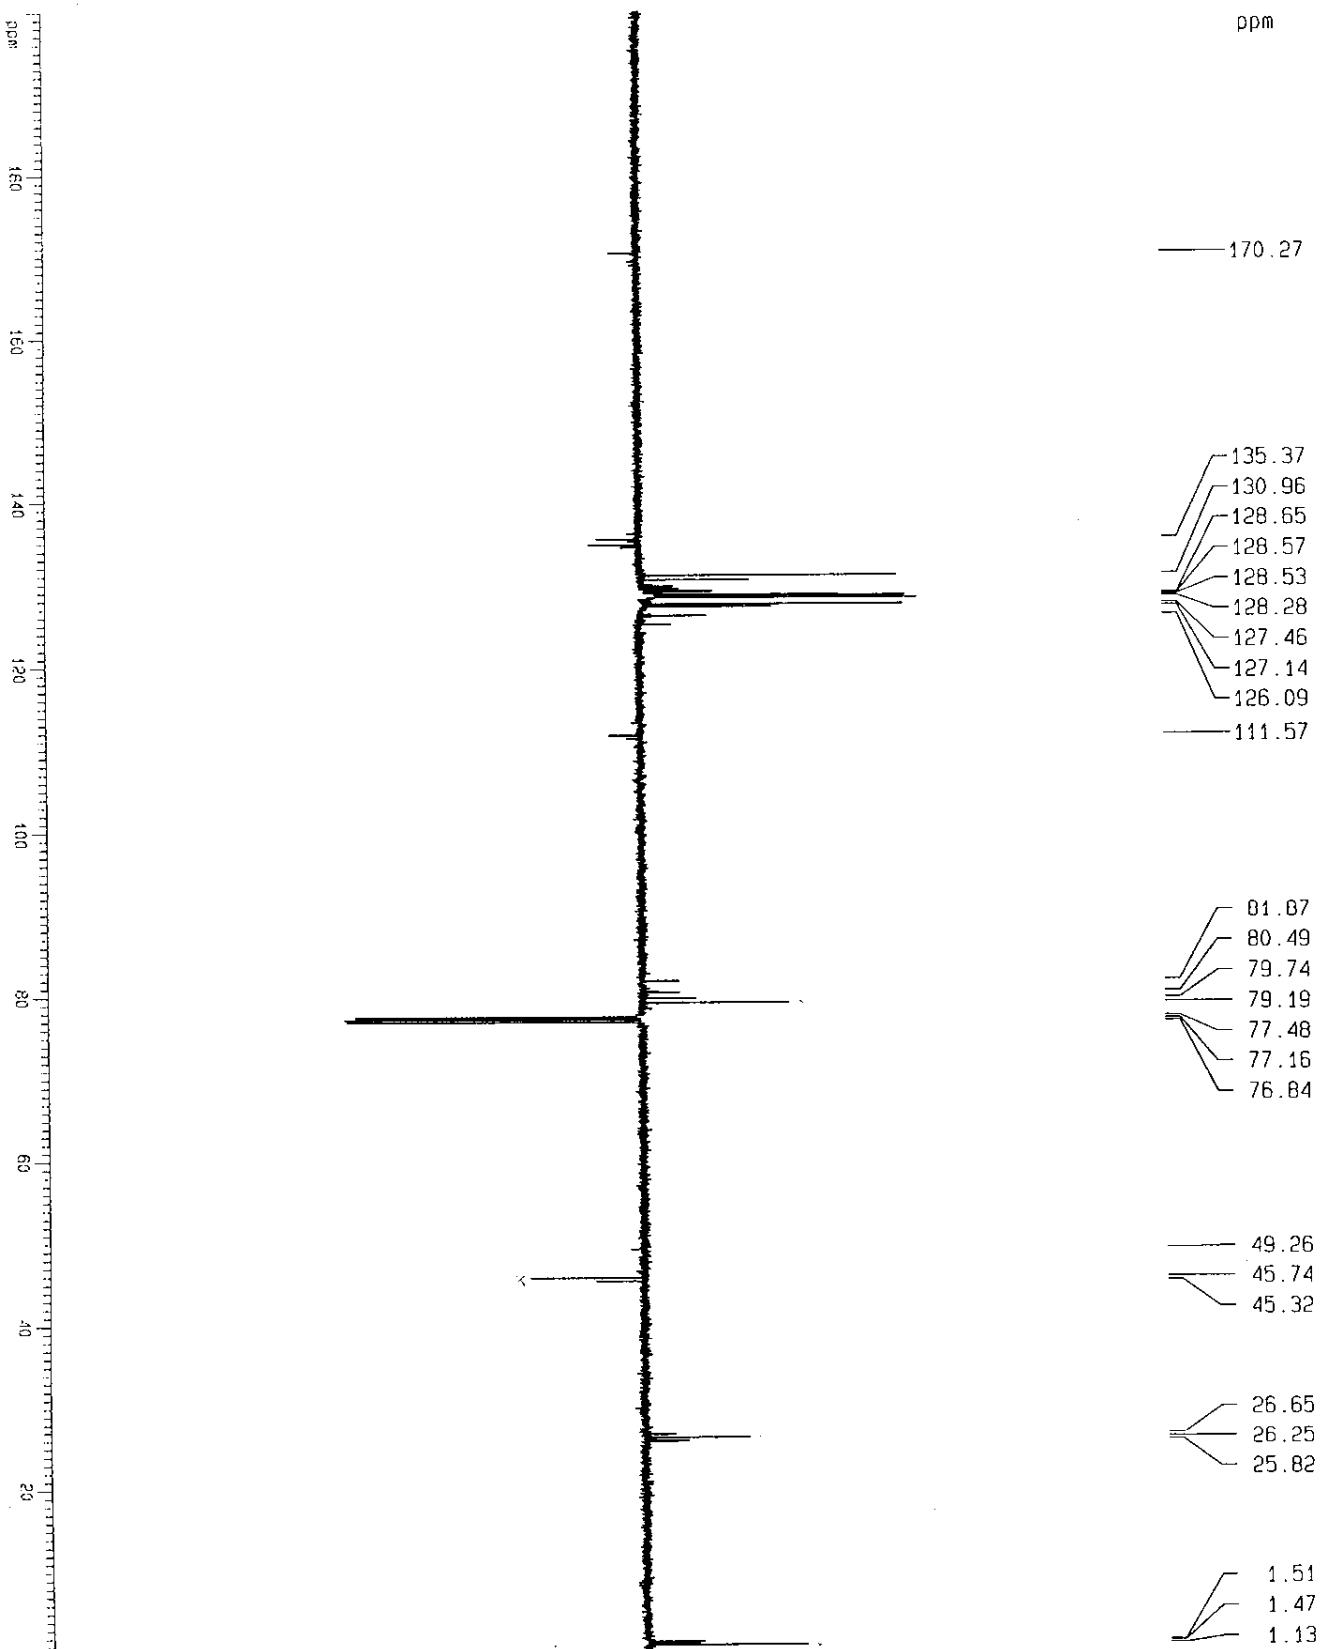

ppm

170.27

135.37  
130.96  
128.65  
128.57  
128.53  
128.28  
127.46  
127.14  
126.09  
111.57

81.87  
80.49  
79.74  
79.19  
77.48  
77.16  
76.84

49.26  
45.74  
45.32

26.65  
26.25  
25.82

1.51  
1.47  
1.13

DNX 400

Current Data Parameters  
NAME hrl-3-99-4thQ-D-lug  
EXPNO 5  
PROCNO 1

F2 - Acquisition Parameters  
Date\_ 20080522  
Time 7.59  
INSTRUM spect  
PROBHD 5 mm Multinucl  
PULPROG 1mod  
TD 65536  
SOLVENT  
NS 3230  
DS 4  
SWH 25125.629 Hz  
FIDRES 0.363367 Hz  
AQ 1.3042164 sec  
RG 9195.2  
DM 19.900 usec  
DE 15.00 usec  
TE 303.2 K  
CNS12 145.000000  
CNS111 1.000000  
D1 6.00000000 sec  
d20 0.00669655 sec  
DELTA 0.0001477 sec  
MCREST 0.00000000 sec  
MCMRK 0.01500000 sec

===== CHANNEL f1 =====  
NUC1 13C  
P1 11.60 usec  
P2 23.20 usec  
PL1 0.00 dB  
SF01 100.629643 MHz

===== CHANNEL f2 =====  
CPDPRG2 waltz16  
NUC2 1H  
PCPD2 100.00 usec  
PL2 4.00 dB  
PL12 26.00 dB  
SF02 400.132000 MHz

F2 - Processing parameters  
SI 65536  
SF 100.6127535 MHz  
WDW EM  
SSB 0  
LB 1.00 Hz  
GB 0  
PC 1.00

1D NMR plot parameters  
CX 22.00 cm  
CY 4.04 cm  
FIP 200.000 ppm  
F1 20122.55 Hz  
F2P -0.000 ppm  
F2 -0.00 Hz  
PPMCM 9.09091 ppm/c  
HZCM 914.66144 Hz/cm

<sup>1</sup>H NMR (400 MHz, CDCl<sub>3</sub>) **6c**

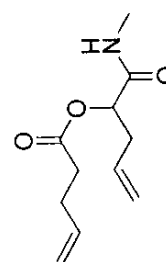

ppm

ppm

- 7.2600
- 6.0818  
5.8499  
5.8329  
5.7216  
5.7037  
5.1113  
5.1073  
5.1008  
5.0727  
5.0683  
5.0641  
5.0603
- 4.1272  
4.1094
- 2.8309  
2.8186  
2.5060  
2.5023  
2.4866  
2.4845  
2.4227  
2.4194  
2.4016  
2.0381  
1.3926  
1.2726  
1.2548  
0.8807  
0.8690  
0.8527

Avance DRX400 NMR Spectrometer

Current Data Parameters  
NAME HRL-3-91m1x-9-12  
EXPNO 1  
PROCNO 1

F2 - Acquisition Parameters

Date\_ 20080514  
Time 20:58  
INSTRUM spect  
PROBHD 5 mm Multinucl  
PULPROG zg30  
TO 32768  
SOLVENT CDCl<sub>3</sub>  
NS 64  
DS 2  
SWH 4789.272 Hz  
FIDRES 0.146157 Hz  
AQ 3.4210291 sec  
RG 322.5  
OW 104.400 usec  
DE 15.00 usec  
TE 303.2 K  
D1 3.00000000 sec  
MCRES1 0.00000000 sec  
MCRESK 0.01500000 sec

===== CHANNEL f1 =====

NUC1 <sup>1</sup>H  
P1 8.50 usec  
PL1 4.00 dB  
SFO1 400.1320006 MHz

F2 - Processing parameters

SF 32768  
SF 400.1300090 MHz  
WDW EM  
SSB 0  
LB 0.20 Hz  
GB 0  
PC 1.00

1D NMR plot parameters

CX 22.00 cm  
CY 10.50 cm  
F1P 10.000 ppm  
F1 4001.30 Hz  
F2P 0.000 ppm  
F2 0.00 Hz  
PPMCM 0.45455 ppm/cm  
HZCM 181.87727 Hz/cm

<sup>13</sup>C NMR (100 MHz, CDCl<sub>3</sub>) 6c

Avance 300 Monash University  
EC3-125B in D2O

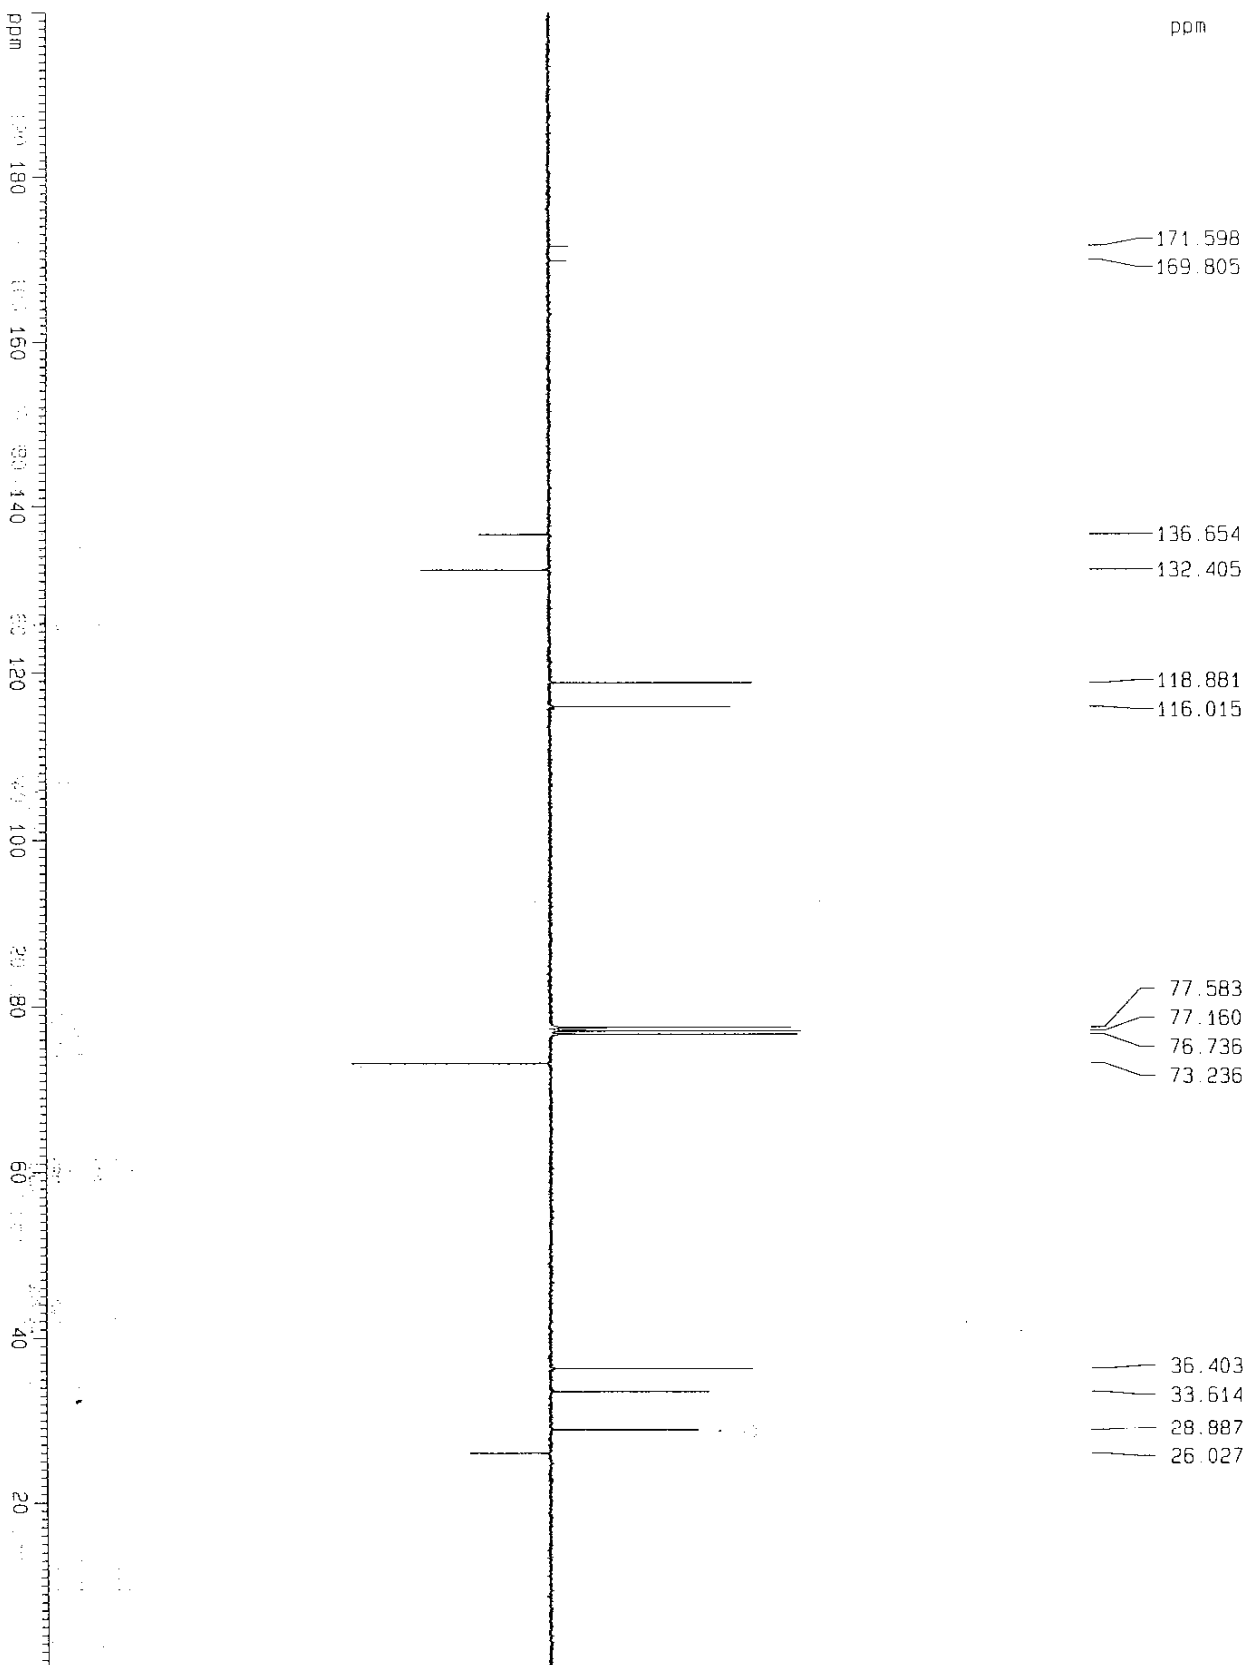

Current Data Parameters  
NAME hrl-3-9tmix-9-12  
EXPNO 3  
PROCNO 1

F2 - Acquisition Parameters  
Date\_ 20080514  
Time 21.23  
INSTRUM spect  
PROBHD 5 mm QNP 1H/1  
PULPROG jmod  
TD 32768  
SOLVENT DMSO  
NS 10836  
DS 4  
SWH 18382.354 Hz  
FIDRES 0.560985 Hz  
AQ 0.8913396 sec  
RG 13004  
DM 27.200 us  
DE 20.00 us  
TE 304.2 K  
CNS12 145.000000  
CNS111 1.000000  
O1 3.00000000 se  
O2 0.00696655 se  
DELTA 0.00001082 se  
MCREST 0.00000000 se  
MCMRK 0.01500000 se

===== CHANNEL f1 =====  
NUC1 13C  
P1 8.50 us  
O2 17.00 us  
PL1 0.00 dB  
SF01 75.4760145 MHz

===== CHANNEL f2 =====  
CPOPRG2 waltz16  
NUC2 1H  
PCPO2 100.00 us  
PL2 -2.00 dB  
PL12 15.00 dB  
SF02 300.1314256 MHz

F2 - Processing parameters  
SI 32768  
SF 75.4677366 MHz  
WDW EM  
SSB 0  
LB 1.00 Hz  
GB 0  
PC 1.40

1D NMR plot parameters  
CX 23.00 cm  
CY 3.50 cm  
F1P 200.000 dB  
F1 15093.55 Hz  
F2P 0.000 dB  
F2 0.00 Hz  
PPMCH 8.69655 dB  
H2CH 656.24115 Hz

<sup>1</sup>H NMR (400 MHz, CDCl<sub>3</sub>) **6f**

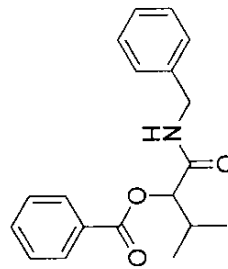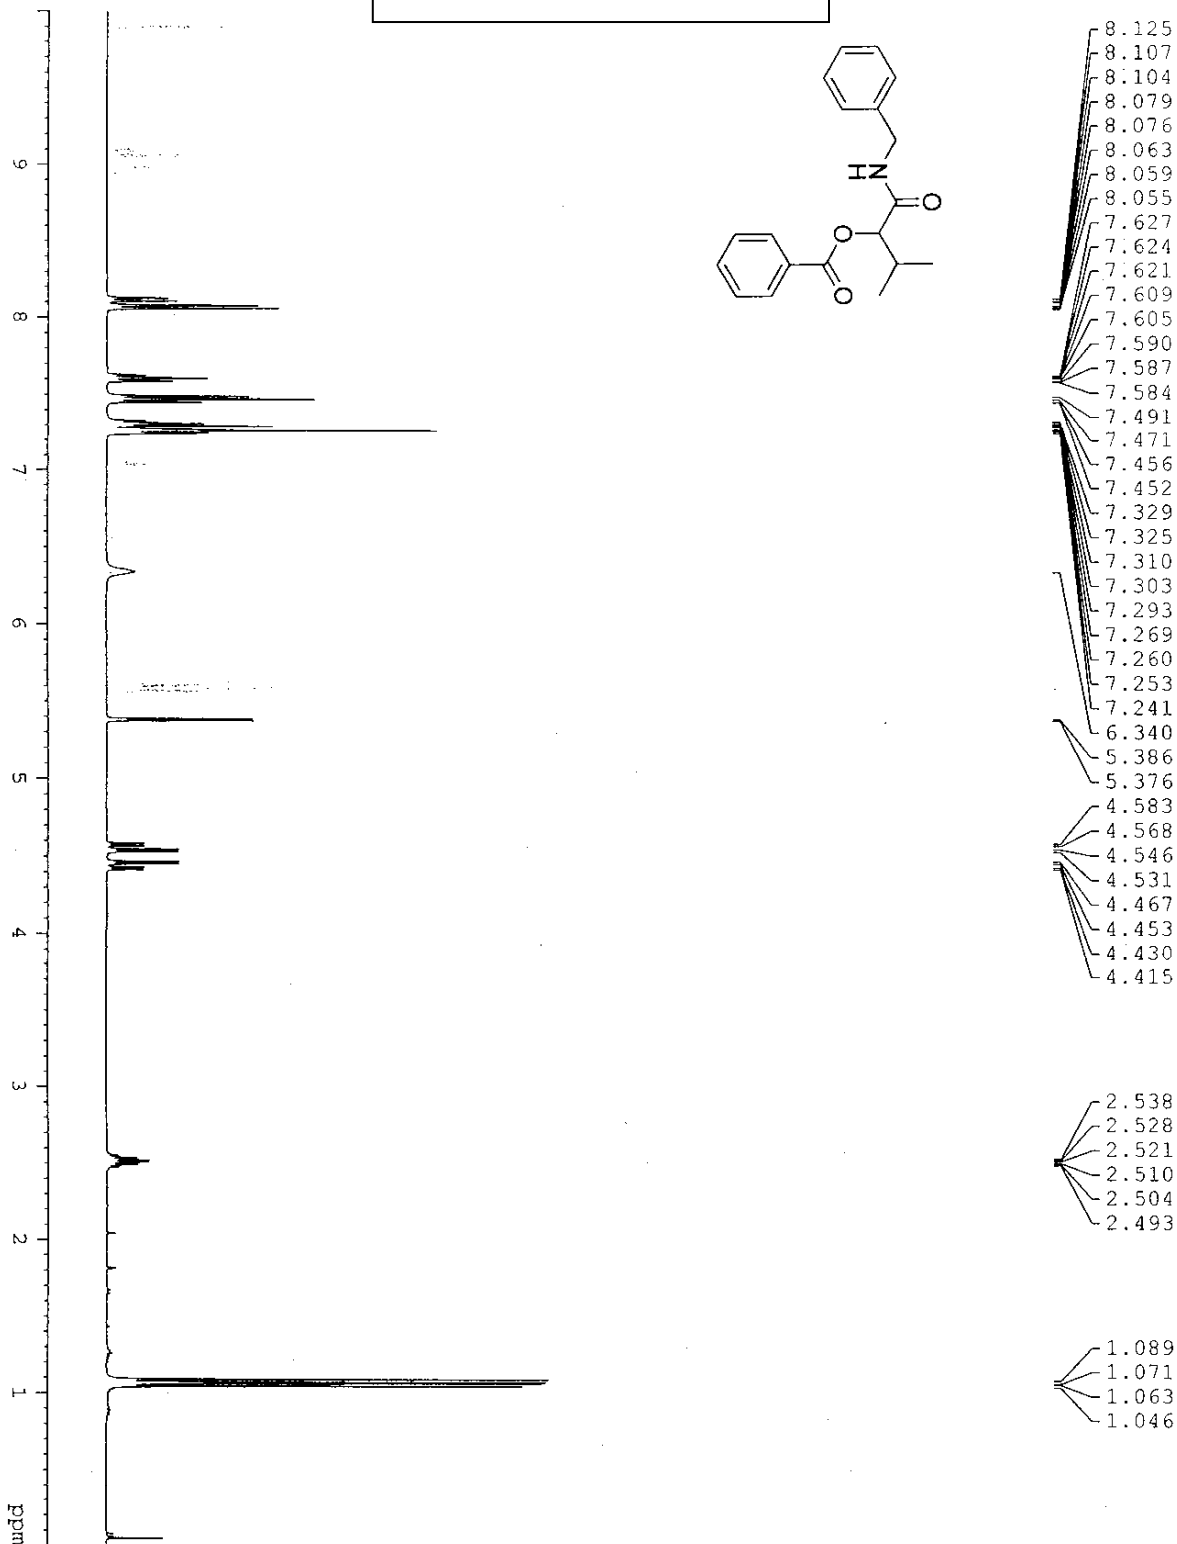

hr1-4-116 f12-16

NAME hr1-4-116-12-16  
EXPNO 1  
PROCNO 1  
Date\_ 20090429  
Time 18.49  
INSTRUM spect  
PROBHD 5 mm 5mm 1H/2H  
PULPROG zg  
TD 48076  
FIDRES 0.100002 Hz  
AQ 4.999542 sec  
RG 45.2  
DE 104.000 usec  
TE 303.2 K  
D1 5.0000000 sec  
TDO 1  
===== CHANNEL f1 =====  
NUC1 1H  
P1 8.00 usec  
PL1 1.95 dB  
PL1W 9.58740711 W  
SFO1 400.1322007 MHz  
SI 32768  
SF 400.130097 MHz  
WDW EM  
SSB 0  
LB 0.30 Hz  
GB 0  
PC 1.00

<sup>13</sup>C NMR (100 MHz, CDCl<sub>3</sub>) **6f**

ppm

169.534  
165.675  
  
138.059  
133.768  
130.331  
129.917  
129.493  
128.884  
128.827  
128.606  
127.739  
127.703  
  
78.843  
77.800  
77.165  
76.530  
  
43.352  
31.007  
  
19.145  
17.230

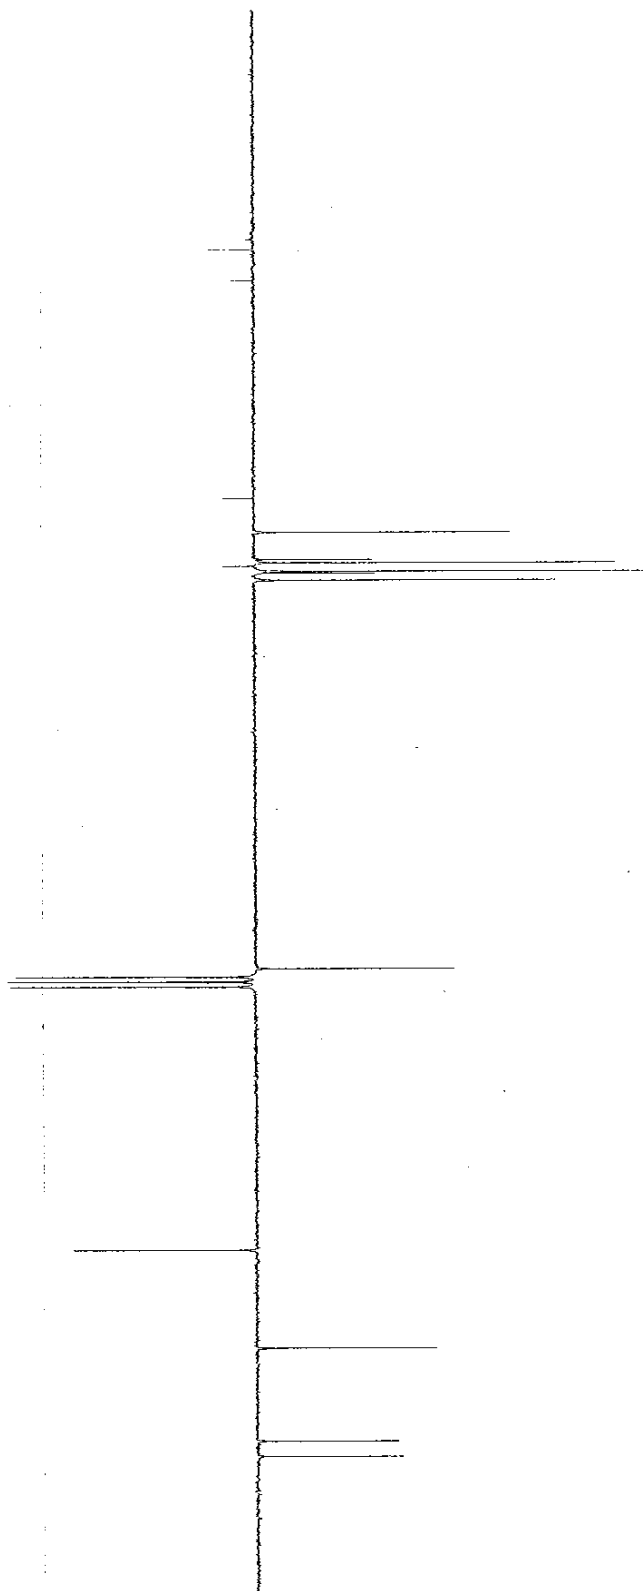

Current Data Parameters  
NAME h-1-4-15-12-16  
EXPNO 3  
PROCNO 1

F2 - Acquisition Parameters  
Date\_ 20090430  
Time 9.22

INSTRUM spect  
PROBHD 5 mm DUL 13C-1  
PULPROG 1mod  
TD 32768  
SOLVENT CDCl3  
NS 9511  
DS B  
SWH 11574.074 Hz  
FIDRES 0.35313 Hz  
AQ 1.4150276 sec  
RG 13390.4  
JM 43.200 usec  
DE 20.00 usec  
TE 303.2 K  
CNS12 145.0000000  
CNS111 1.0000000  
D1 4.00000000 sec  
D20 0.00689555 sec  
DELTA 0.00601528 sec  
MCREST 0.00000000 sec  
KCMRK 0.01500000 sec

===== CHANNEL f1 =====  
NUC1 13C  
P1 12.00 usec  
P2 24.00 usec  
PL1 2.00 dB  
SF01 50.3280129 MHz  
  
===== CHANNEL f2 =====  
COPPRG2 waltz16  
NUC2 1H  
PCPD2 160.00 usec  
PL2 0.00 dB  
PL12 20.45 dB  
SF02 200.1309054 MHz

F2 - Processing Parameters  
SI 32768  
SF 50.3282203 MHz  
WDW EM  
SSB 0  
LB 1.00 Hz  
GB 0  
PC 1.00

13 NMR plot parameters  
CX 22.00 um  
CY 3.49 cm  
FID 319.000 ppm  
F1 127.703 Hz  
F2 127.739 Hz  
F3 127.703 Hz  
F4 127.703 Hz  
F5 127.703 Hz  
F6 127.703 Hz  
F7 127.703 Hz  
F8 127.703 Hz  
F9 127.703 Hz  
F10 127.703 Hz  
F11 127.703 Hz  
F12 127.703 Hz  
F13 127.703 Hz  
F14 127.703 Hz  
F15 127.703 Hz  
F16 127.703 Hz  
F17 127.703 Hz  
F18 127.703 Hz  
F19 127.703 Hz  
F20 127.703 Hz  
F21 127.703 Hz  
F22 127.703 Hz  
F23 127.703 Hz  
F24 127.703 Hz  
F25 127.703 Hz  
F26 127.703 Hz  
F27 127.703 Hz  
F28 127.703 Hz  
F29 127.703 Hz  
F30 127.703 Hz  
F31 127.703 Hz  
F32 127.703 Hz  
F33 127.703 Hz  
F34 127.703 Hz  
F35 127.703 Hz  
F36 127.703 Hz  
F37 127.703 Hz  
F38 127.703 Hz  
F39 127.703 Hz  
F40 127.703 Hz  
F41 127.703 Hz  
F42 127.703 Hz  
F43 127.703 Hz  
F44 127.703 Hz  
F45 127.703 Hz  
F46 127.703 Hz  
F47 127.703 Hz  
F48 127.703 Hz  
F49 127.703 Hz  
F50 127.703 Hz  
F51 127.703 Hz  
F52 127.703 Hz  
F53 127.703 Hz  
F54 127.703 Hz  
F55 127.703 Hz  
F56 127.703 Hz  
F57 127.703 Hz  
F58 127.703 Hz  
F59 127.703 Hz  
F60 127.703 Hz  
F61 127.703 Hz  
F62 127.703 Hz  
F63 127.703 Hz  
F64 127.703 Hz  
F65 127.703 Hz  
F66 127.703 Hz  
F67 127.703 Hz  
F68 127.703 Hz  
F69 127.703 Hz  
F70 127.703 Hz  
F71 127.703 Hz  
F72 127.703 Hz  
F73 127.703 Hz  
F74 127.703 Hz  
F75 127.703 Hz  
F76 127.703 Hz  
F77 127.703 Hz  
F78 127.703 Hz  
F79 127.703 Hz  
F80 127.703 Hz  
F81 127.703 Hz  
F82 127.703 Hz  
F83 127.703 Hz  
F84 127.703 Hz  
F85 127.703 Hz  
F86 127.703 Hz  
F87 127.703 Hz  
F88 127.703 Hz  
F89 127.703 Hz  
F90 127.703 Hz  
F91 127.703 Hz  
F92 127.703 Hz  
F93 127.703 Hz  
F94 127.703 Hz  
F95 127.703 Hz  
F96 127.703 Hz  
F97 127.703 Hz  
F98 127.703 Hz  
F99 127.703 Hz  
F100 127.703 Hz

<sup>1</sup>H NMR (400 MHz, CDCl<sub>3</sub>) **6g**

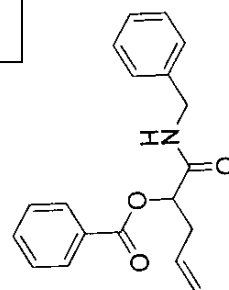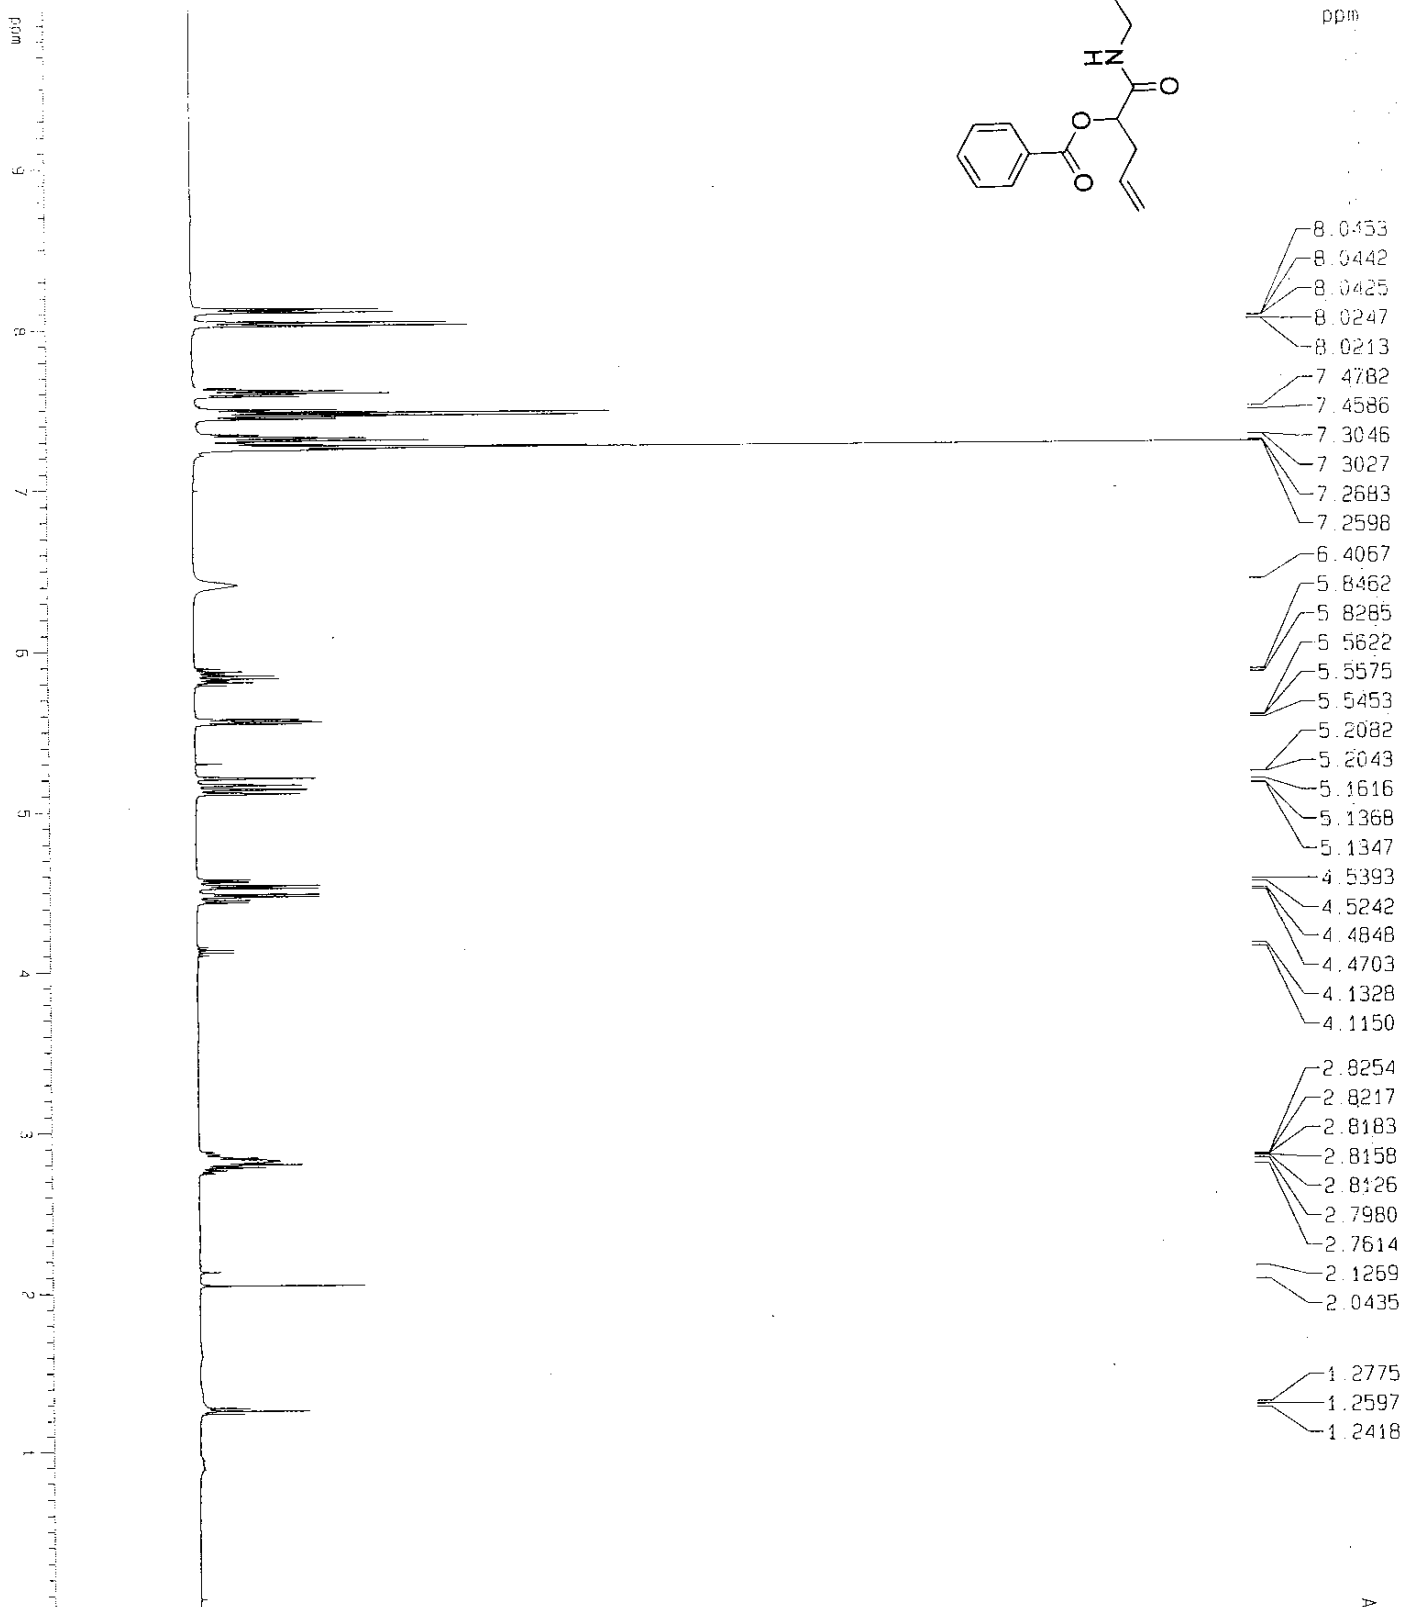

Avance DRX400 NMR Spectrometer

Current Data Parameters  
NAME n1-4-44-2  
EXPNO 1  
PROCNO 1

F2 - Acquisition Parameters  
Date\_ 20081211  
Time 18.25  
INSTRUM spect  
PROBHD 5 mm Multinuc1  
PULPROG zg30  
TD 32768  
SOLVENT CDCl3  
NS 64  
DS 2  
SMH 4789.272 Hz  
FIDRES 0.146157 Hz  
AQ 3.4210291 sec  
RG 456.1  
OW 104.400 usec  
DE 15.50 usec  
TE 303.2 K  
D1 3.00000000 sec  
MCREST 0.00000000 sec  
MCNMRK 0.01500000 sec

===== CHANNEL f1 =====  
NUC1 <sup>1</sup>H  
P1 8.50 usec  
PL1 4.00 dB  
SF01 400.1320006 MHz

F2 - Processing parameters  
SI 32768  
SF 400.1320009 MHz  
WDW EM  
SSB 0  
LB 0.20 Hz  
GB 0  
PC 1.00

1D NMR Plot Parameters  
CX 22.00 cm  
CY 15.13 cm  
F1P 10.000 ppm  
F1 4001.30 Hz  
F2P 0.000 ppm  
F2 0.00 Hz  
PPMCK 0.45455 ppm/cm  
HZCM 181.87727 Hz/cm



<sup>13</sup>C NMR (100 MHz, CDCl<sub>3</sub>) **6g**

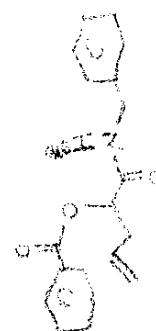

DRX 400

ppm

169.16  
165.30

137.79  
133.66  
132.10  
130.21  
129.77  
129.27  
128.76  
128.49  
127.60  
119.16

77.34  
77.02  
76.70  
73.67

43.27  
36.35

Current Data Parameters  
NAME hr1-4-44-2  
EXPNO 4  
PROCNO 1

F2 - Acquisition Parameters  
Date\_ 20081212  
Time 17.38

INSTRUM spect  
PROBHD 5 mm MUltiNuc1  
PULPROG 1m0d  
TD 65536  
SOLVENT NS  
DS 4  
SMH 25125.629 Hz  
FIDRES 0.38387 Hz  
AQ 1.3042164 sec  
RG 9195.2  
OW 19.900 usec  
DE 15.50 usec  
TE 303.2 K  
CNS12 145.000000  
CNS111 1.000000  
SI 6  
a20 0.00689655 sec  
DELTA 0.00001477 sec  
MCREST 0.00000000 sec  
MCMRK 0.01500000 sec

\*\*\*\*\* CHANNEL f1 \*\*\*\*\*

NUC1 <sup>13</sup>C  
P1 11.60 usec  
a2 23.20 usec  
PL1 0.00 dB  
SF01 100.6229643 MHz

\*\*\*\*\* CHANNEL f2 \*\*\*\*\*

CPDPRG2 waltz16  
NUC2 <sup>1</sup>H  
PCPD2 100.00 usec  
PL2 4.00 dB  
PL12 28.00 dB  
SF02 400.1320000 MHz

F2 - Processing parameters

SI 65536  
SF 100.6127670 MHz  
WDW EM  
SSB 0  
LB 1.00 Hz  
GB 0  
PC 1.00

10 NMR plot parameters

CX 22.00 cm  
CY 12.34 cm  
F1P 200.000 ppm  
F1 201.2255 Hz  
F2P -0.000 ppm  
F2 -0.00 Hz  
PPMCM 9.0981 ppm/cm  
HZCM 914.66156 Hz/cm

<sup>1</sup>H NMR (400 MHz, CDCl<sub>3</sub>) 6h

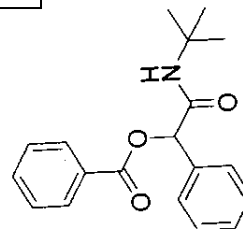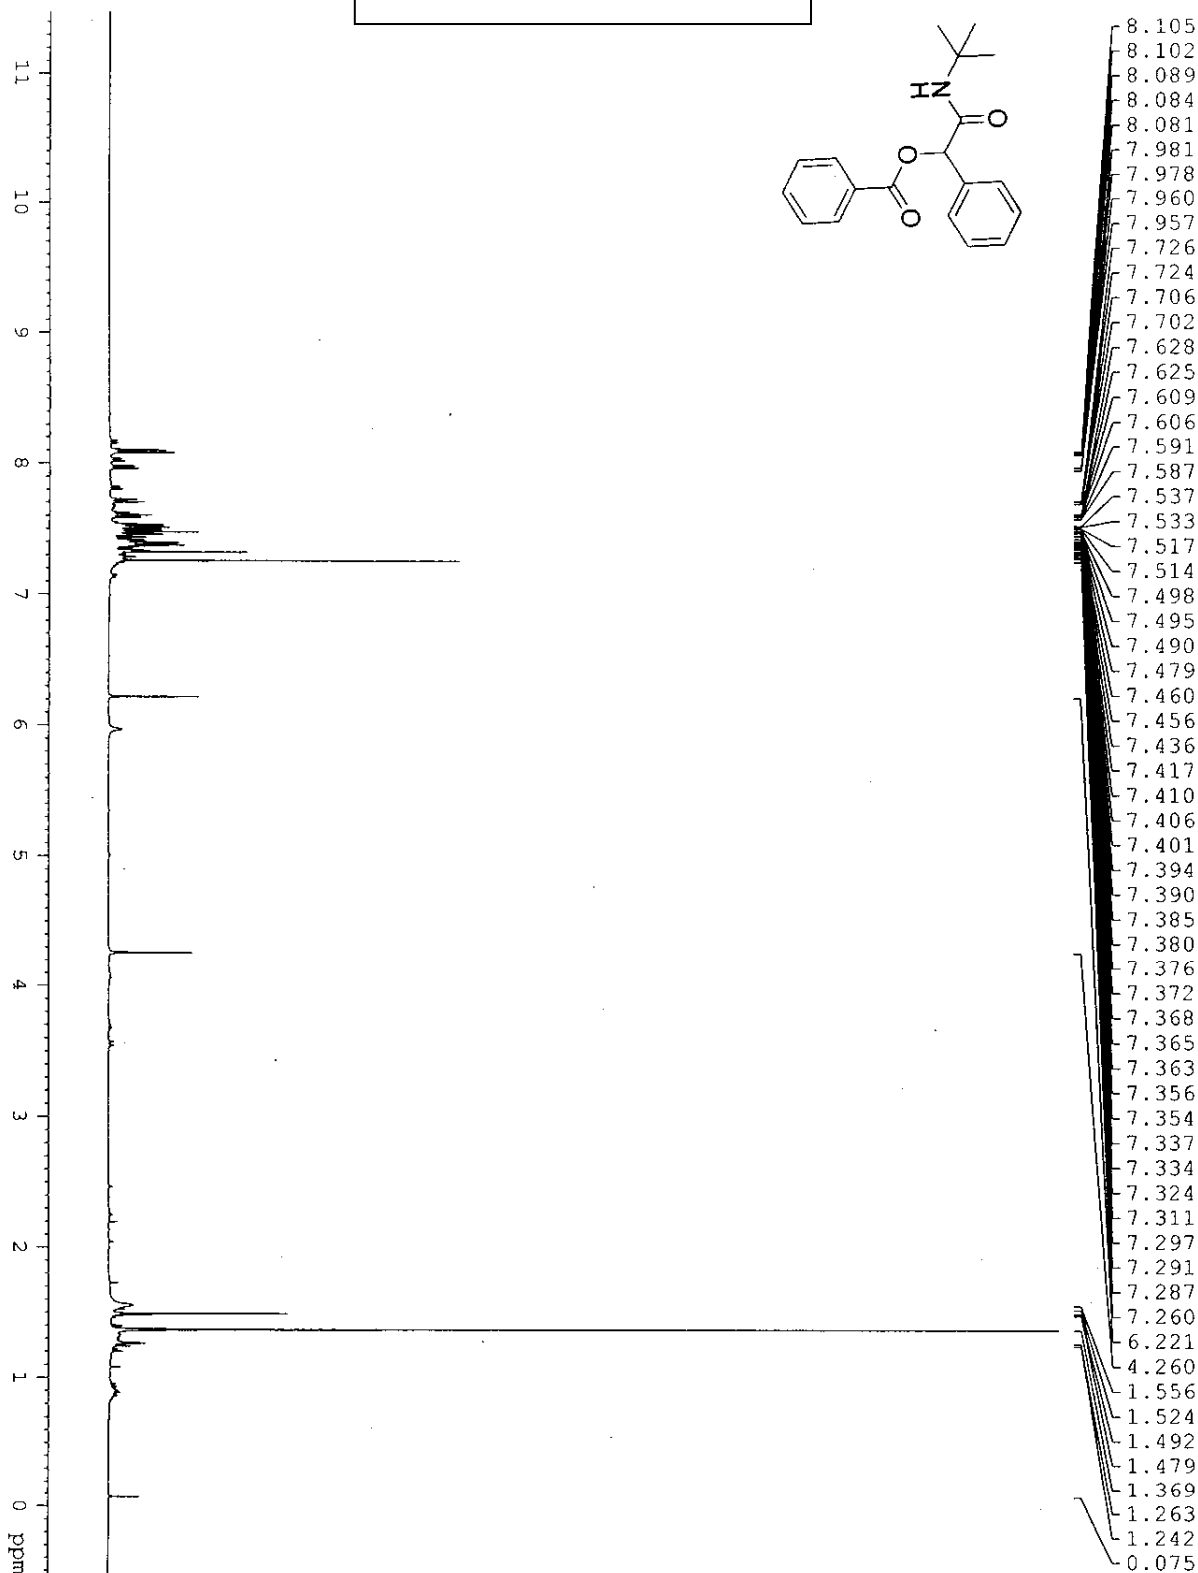

hrl-4-100-7-8 t-bu 2eq

```
NAME hrl-4-100-7-8
EXPNO 1
PROCNO 1
Date_ 20090403
Time_ 18.07
INSTRUM spect
PROBHD 5 mm 5mm 1H/2H
PULPROG zg
TD 48076
SOLVENT CDCl3
NS 32
DS 2
SWH 4807.692 Hz
FIDRES 0.100002 Hz
AQ 4.999542 sec
RG 181
DM 104.000 usec
DE 14.56 usec
TE 303.2 K
D1 5.00000000 sec
TDO 1

===== CHANNEL f1 =====
NUC1 1H
P1 8.00 usec
PL1 1.95 dB
PL1W 9.58740711 W
SFO1 400.1322007 MHz
SI 32768
SF 400.1300097 MHz
WDW EM
SSB 0
LB 0.30 Hz
GB 0
PC 1.00
```

<sup>13</sup>C NMR (100 MHz, CDCl<sub>3</sub>) 6h

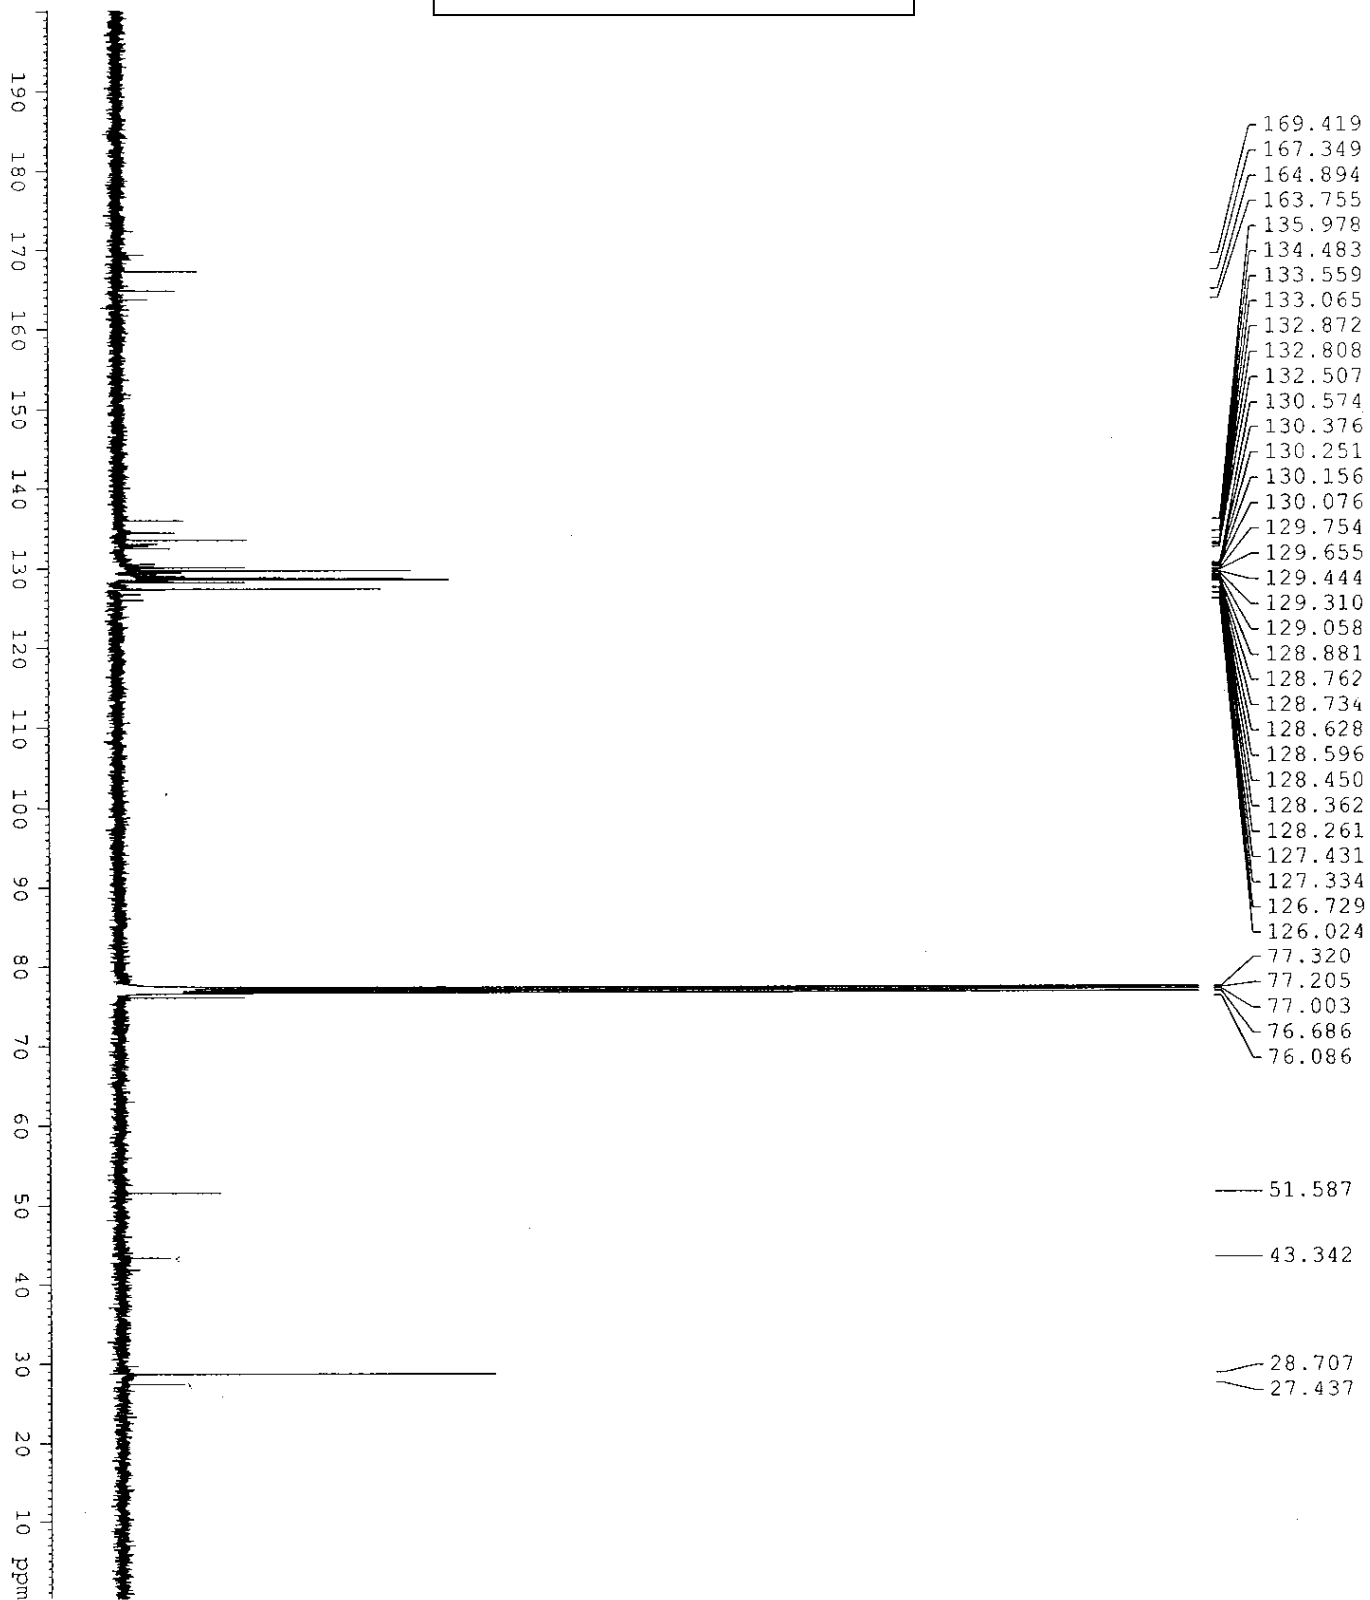

Acquire III - 13C with 1H Presaturated Decoupling

|         |                |
|---------|----------------|
| NAME    | hrl-4-100-7-8  |
| EXPNO   | 4              |
| PROCNO  | 1              |
| Date_   | 20090403       |
| Time    | 22.17          |
| INSTRUM | spect          |
| PROBHD  | 5 mm 5mm 1H/2H |
| PULPROG | zgpg30         |
| TD      | 65536          |
| SOLVENT | CDCl3          |
| NS      | 5640           |
| DS      | 4              |
| SWH     | 22058.824 Hz   |
| FIDRES  | 0.336591 Hz    |
| AQ      | 1.4855326 sec  |
| RG      | 2050           |
| DW      | 22.667 usec    |
| DE      | 12.00 usec     |
| TE      | 303.2 K        |
| D1      | 10.0000000 sec |
| D11     | 0.0300000 sec  |
| TD0     | 1              |

===== CHANNEL f1 =====

|      |                 |
|------|-----------------|
| NUC1 | 13C             |
| P1   | 14.00 usec      |
| PL1  | 0.00 dB         |
| PL1W | 95.45168304 W   |
| SFO1 | 100.6223263 MHz |

===== CHANNEL f2 =====

|         |                 |
|---------|-----------------|
| CPDPRG2 | waltz16         |
| NUC2    | 1H              |
| PCPD2   | 80.00 usec      |
| PL2     | 1.95 dB         |
| PL12    | 22.20 dB        |
| PL13    | 28.00 dB        |
| PL2W    | 9.58740711 W    |
| PL12W   | 0.09051095 W    |
| PL13W   | 0.02380681 W    |
| SFO2    | 400.1316005 MHz |
| SI      | 32768           |
| SF      | 100.6127690 MHz |
| WDW     | EM              |
| SSB     | 0               |
| LB      | 1.00 Hz         |
| GB      | 0               |
| PC      | 1.40            |

<sup>1</sup>H NMR (400 MHz, CDCl<sub>3</sub>) **9**

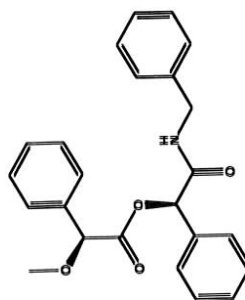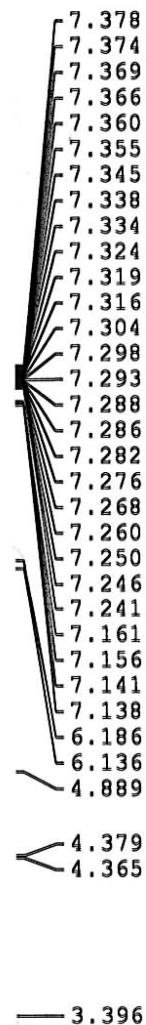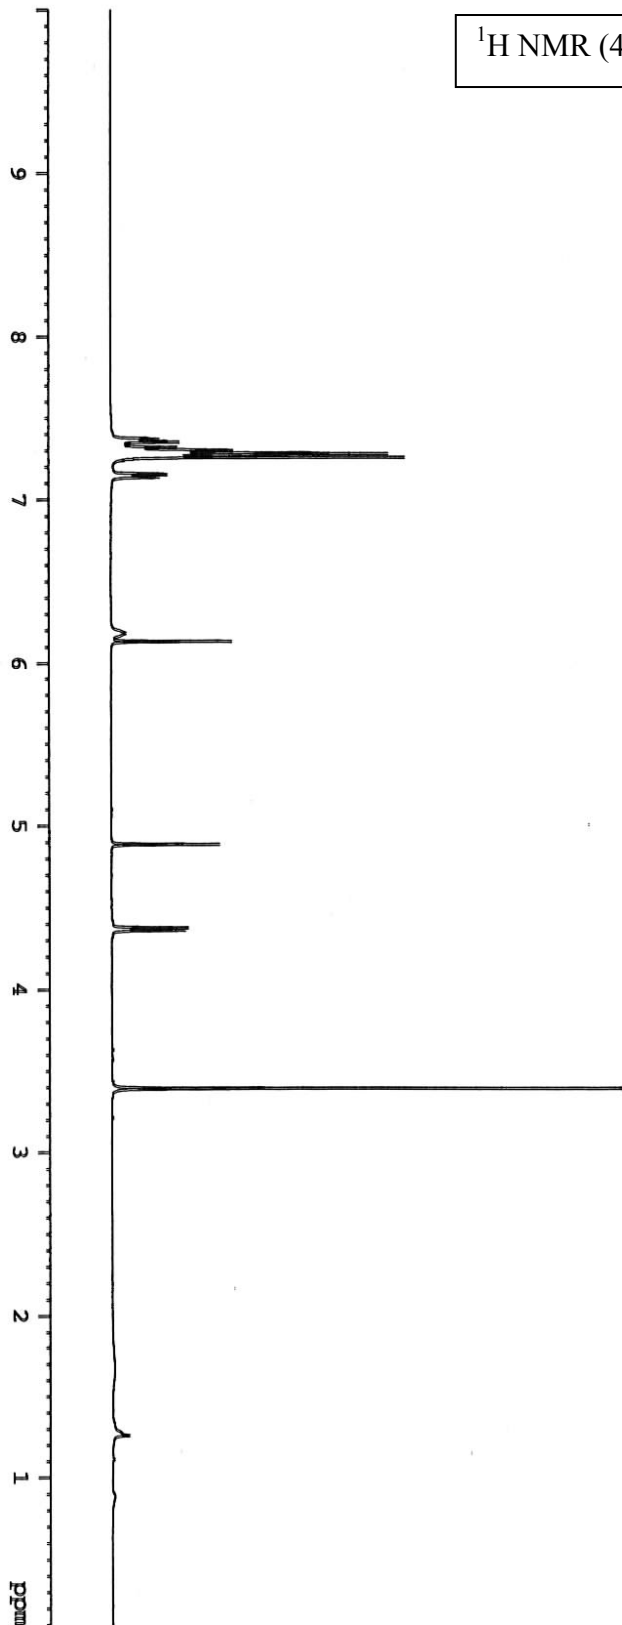

```

NAME          hr1-3-114-3c
EXPNO         1
PROCNO        1
Date_         20090825
Time_         12.42
INSTRUM       spect
PROBHD        5 mm 5mm 1H/2H
PULPROG       zgpg
TD            48076
SOLVENT       CDCl3
NS            32
DS            2
SWH           4807.692 Hz
FIDRES        0.100002 Hz
AQ            4.999542 sec
RG            161
IDW           104.000 usec
DE            14.56 usec
TE            303.2 K
D1            5.0000000 sec
TD0           1

===== CHANNEL f1 =====
NUC1          1H
P1            8.00 usec
PL1           1.95 dB
PL1W          9.58740711 W
SFO1          400.1322007 MHz
SI            32768
SF            400.1300098 MHz
WDW           EM
SSB           0
LB            0.30 Hz
GB            0
PC            1.00
  
```

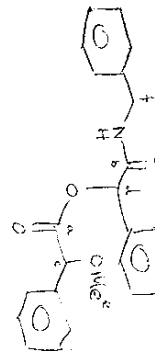

Avance 300 Monash University  
EC3-125B in D2O

ppm

169.007  
167.964

137.705  
135.735  
135.075  
129.115  
129.089  
128.926  
128.894  
128.805  
127.783  
127.182  
127.039

82.832  
77.584  
77.161  
76.738  
75.989

57.772

43.516

1.161

$^{13}\text{C}$  NMR (100 MHz,  $\text{CDCl}_3$ ) **9**

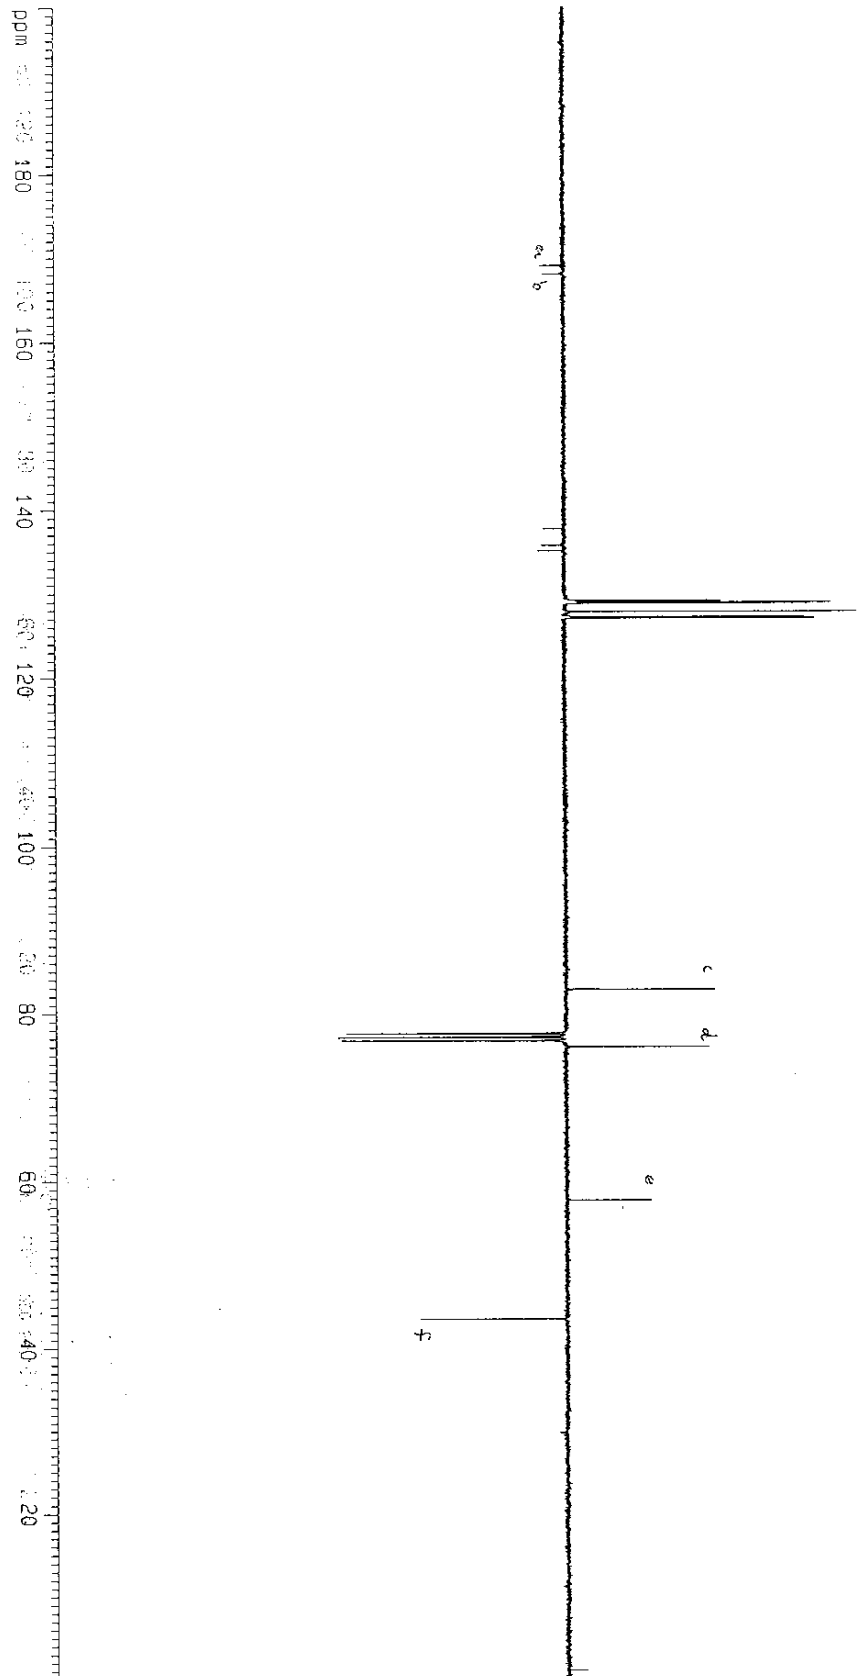

Current Data Parameters  
NAME hr1-3-114-3  
EXPNO 3  
PROCNO 1

F2 - Acquisition Parameters  
Date\_ 20080618  
Time 23.16

INSTRUM spect  
PROBHD 5 mm GNP 1H/1  
PULPROG jmod  
TD 32768  
SOLVENT DMSO  
NS 7339  
DS 2

SMH 18382.354 Hz  
FIDRES 0.560985 Hz  
AQ 0.8913396 s  
RG 13004

DM 27.200 us  
DE 20.00 us  
TE 303.2 K

CNST2 145.000000  
CNST11 1.000000  
D1 3.00000000 s  
d20 0.00689655 s

DELTA 0.00901082 s  
MCREST 0.00900000 s  
MCMBK 0.01500000 s

===== CHANNEL f1 =====  
NUC1  $^{13}\text{C}$   
P1 8.50 us  
P2 17.00 us  
PL1 0.00 dB  
SF01 75.4760145 MHz

===== CHANNEL f2 =====  
CPDPRG2 mslr216  
NUC2  $^1\text{H}$   
PCPD2 100.00 us  
PL2 -2.00 dB  
PL12 15.00 dB  
SF02 300.1314256 MHz

F2 - Processing parameters  
SI 32768  
SF 75.4677366 MHz  
WDW EM  
SSB 0  
LB 1.00 Hz  
GB 0  
PC 1.40

1D NMR plot parameters  
CX 23.00 cm  
CY 4.10 cm  
F1P 200.000 MHz  
F1 15093.55 MHz  
F2P 0.000 MHz  
F2 0.00 MHz  
PPMCM 8.66565 MHz  
HZCM 556.24115 MHz

<sup>1</sup>H NMR (400 MHz, CDCl<sub>3</sub>) **10**

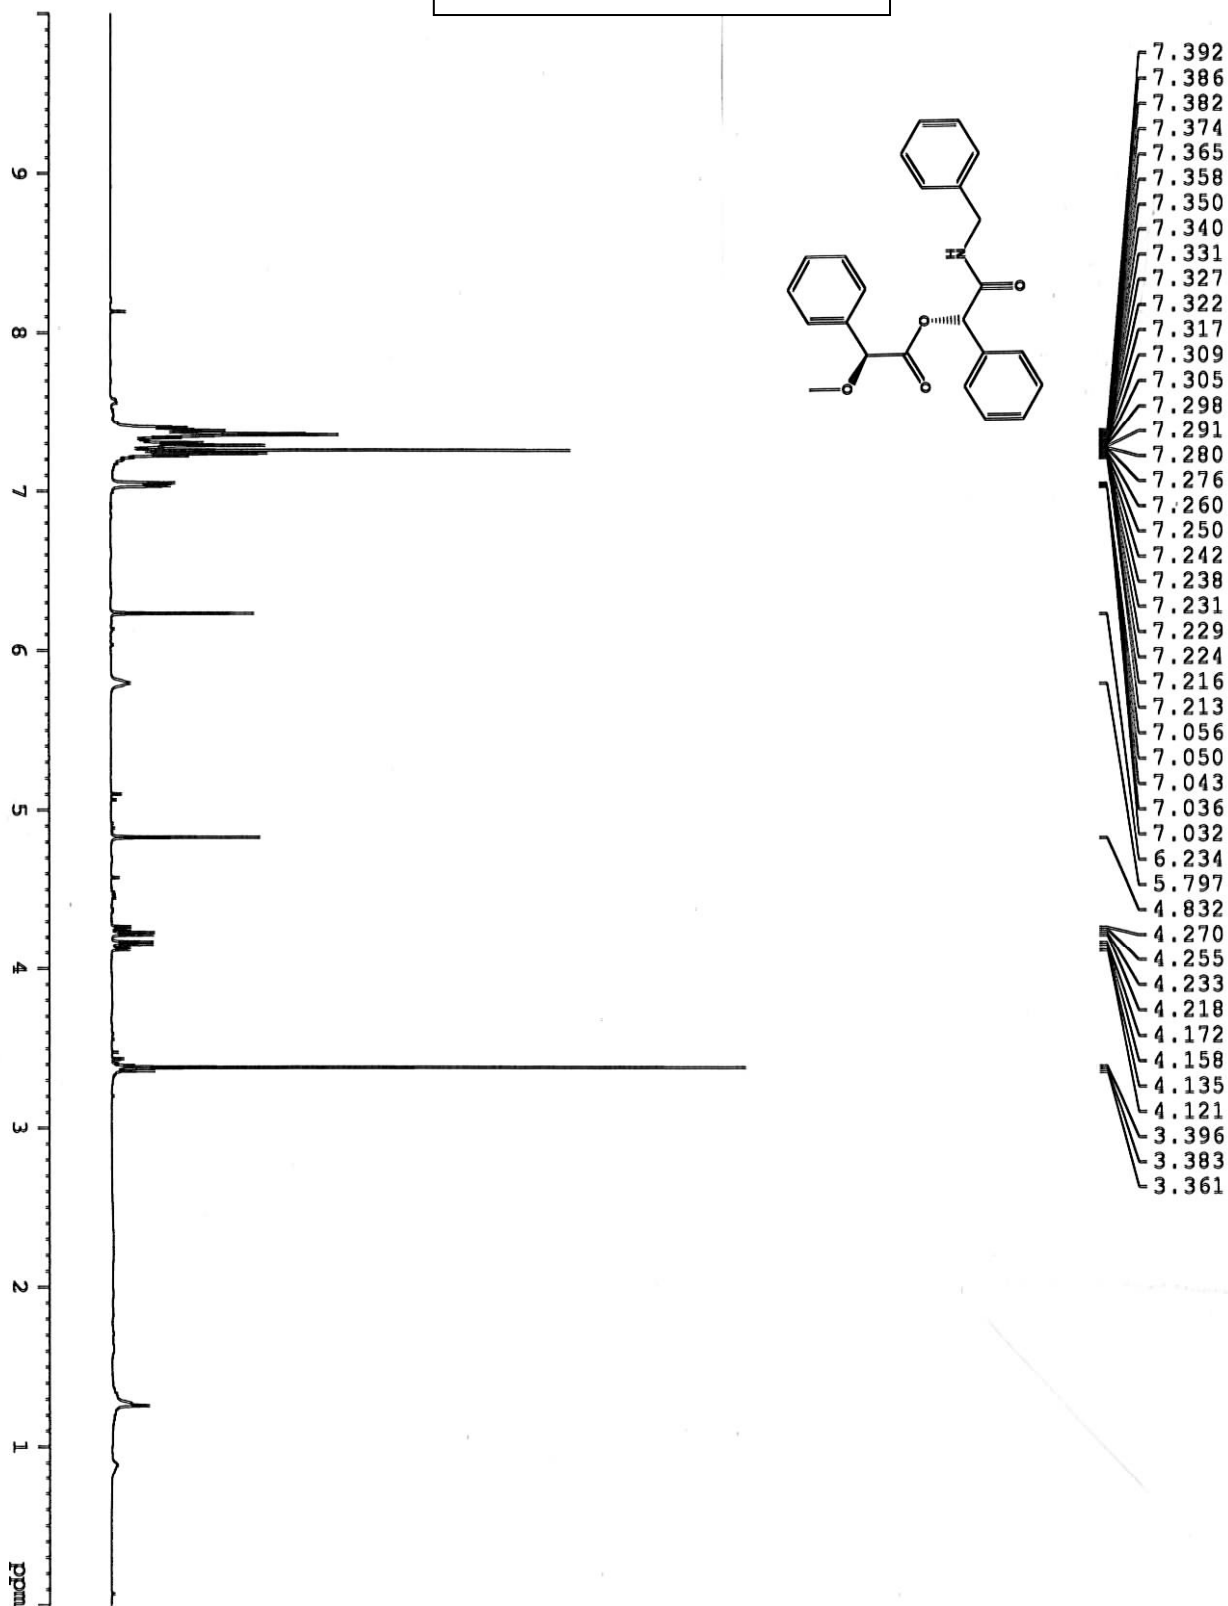

NAME hr1-3-114-2c  
EXPNO 1  
PROCNO 1  
Date\_ 20090825  
Time\_ 12.55  
INSTRUM spect  
PROBHD 5 mm 5mm 1H/2H  
PULPROG zg  
TD 48076  
SOLVENT CDCl3  
NS 32  
DS 2  
SWH 4807.692 Hz  
FIDRES 0.100002 Hz  
AQ 4.999542 sec  
RG 161  
DM 104.000 usec  
DE 14.56 usec  
TE 303.2 K  
D1 5.0000000 sec  
TD0 1

===== CHANNEL f1 =====  
NUC1 1H  
P1 8.00 usec  
PL1 1.95 dB  
PL1W 9.58740711 W  
SFO1 400.1322007 MHz  
SI 32768  
SF 400.1300098 MHz  
WDW EM  
SSB 0  
LB 0.30 Hz  
GB 0  
PC 1.00

<sup>13</sup>C NMR (100 MHz, CDCl<sub>3</sub>) **10**

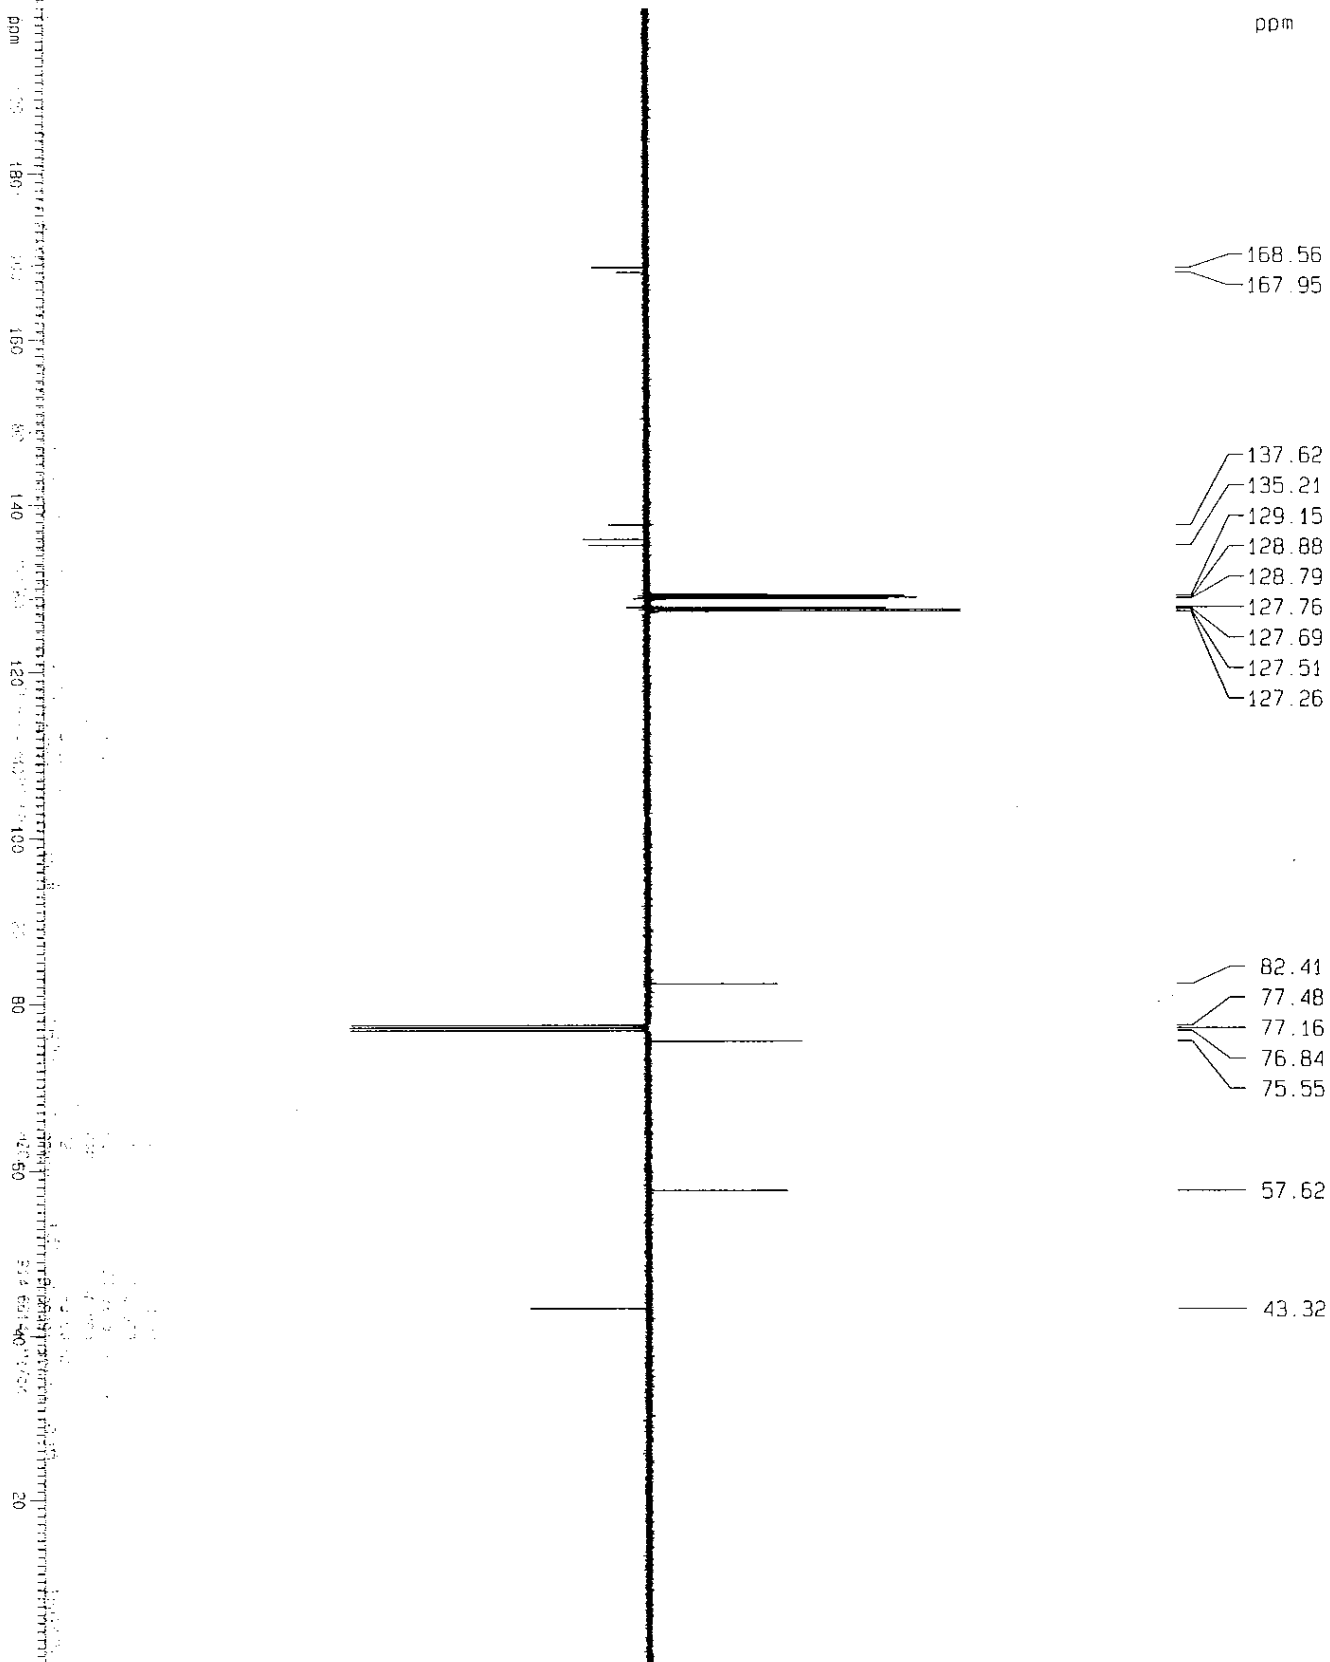

Current Data Parameters  
NAME hr-1-3-114-2  
EXPNO 3  
PROCNO 1

F2 - Acquisition Parameters  
Date\_ 20080620  
Time 19.15

INSTRUM spect  
PROBHD 5 mm Multinucl  
PULPROG jmod  
TD 65536  
SOLVENT  
NS 9027

DS 4  
SWH 25125.629 Hz  
FIDRES 0.383387 Hz  
AQ 1.3042164 sec  
RG 9195.2  
DM 19.900 usec  
DE 15.00 usec  
TE 303.2 K

CNST2 145.000000  
CNST11 1.000000  
D1 6.0000000 sec  
d20 0.00689655 sec  
DELTA 0.0001477 sec  
MCHES1 0.0000000 sec  
MCHRS 0.0150000 sec

===== CHANNEL f1 =====  
NUC1 <sup>13</sup>C  
P1 11.60 usec  
PL2 23.20 usec  
PL1 0.00 dB  
SFO1 100.6229643 MHz

===== CHANNEL f2 =====  
CPDPRG2 waltz16  
NUC2 <sup>1</sup>H  
PCPD2 100.00 usec  
PL2 4.00 dB  
PL12 28.00 dB  
SFO2 400.1320000 MHz

F2 - Processing parameters  
SI 65536  
SF 100.6127531 MHz  
WDW no  
SSB 0  
LB 0.00 Hz  
GB 0  
PC 1.00

1D NMR plot parameters  
CX 22.00 cm  
CY 4.22 cm  
FIP 200.000 ppm  
F1 20122.55 Hz  
F2P -0.000 ppm  
F2 -0.00 Hz  
PPMCM 9.09091 ppm/c  
HZCM 914.66144 Hz/cm
